# Supplementary material
Source: PubMed Central journal article supplement (PMC2736357)
Supplement: NIHMS86497-supplement-1_si_001.pdf [file NIHMS86497-supplement-1_si_001.pdf]

Synthesis of 7-Azaindoles by Chichibabin Cyclization:  
Reversible Base-Mediated Dimerization of 3-Picolines

Yun Ma, Sean Breslin, Ivan Keresztes, Emil Lobkovsky and David B. Collum\*†

Contribution from the Department of Chemistry and Chemical Biology  
Baker Laboratory, Cornell University, Ithaca, New York 14853-1301

**Supporting Information**

|             |                                                                                                                                                       |            |
|-------------|-------------------------------------------------------------------------------------------------------------------------------------------------------|------------|
| <b>I</b>    | $^1\text{H}$ and $^{13}\text{C}$ NMR spectra of <b>2</b> in $\text{DMSO-}d_6$ .                                                                       | <b>S5</b>  |
| <b>II</b>   | $^{19}\text{F}$ NMR spectra of <b>1</b> with LDA in neat THF showing reaction to form <b>5</b> .                                                      | <b>S6</b>  |
| <b>III</b>  | $^6\text{Li}$ and $^{19}\text{F}$ NMR spectra of <b>1</b> with LDA in neat THF showing reaction to form <b>5</b> .                                    | <b>S7</b>  |
| <b>IV</b>   | $^6\text{Li}$ NMR spectra of <b>1</b> with [ $^6\text{Li}$ , $^{15}\text{N}$ ]LDA in neat THF after aging to form <b>5</b> .                          | <b>S8</b>  |
| <b>V</b>    | $^1\text{H}$ NMR and $^{13}\text{C}$ NMR spectra of <b>1</b> with LDA in neat THF- $d_8$ showing reaction to form <b>5</b> .                          | <b>S9</b>  |
| <b>VI</b>   | $^1\text{H}$ NMR spectra of <b>1</b> with LDA in neat THF- $d_8$ showing reaction to form <b>5</b> . Only aromatic and vinylic regions are displayed. | <b>S10</b> |
| <b>VII</b>  | $[\text{}^1\text{H}, \text{}^1\text{H}]$ COSY spectrum of <b>1</b> with LDA in neat THF- $d_8$ showing reaction to form <b>5</b> .                    | <b>S11</b> |
| <b>VIII</b> | $[\text{}^1\text{H}, \text{}^{13}\text{C}]$ HMBC spectrum of <b>1</b> with LDA in neat THF- $d_8$ showing reaction to form <b>5</b> .                 | <b>S12</b> |
| <b>IX</b>   | $J\{\text{}^1\text{H}, \text{}^{19}\text{F}\}$ resolved spectrum of <b>1</b> with LDA in neat THF- $d_8$ showing reaction to form <b>5</b> .          | <b>S13</b> |
| <b>X</b>    | $^{19}\text{F}$ NMR spectra of <b>5</b> in neat THF- $d_8$ after $\text{H}_2\text{O}/\text{THF}$ quench to form <b>7</b> .                            | <b>S14</b> |
| <b>XI</b>   | $[\text{}^1\text{H}, \text{}^1\text{H}]$ COSY spectrum of <b>7</b> in neat THF- $d_8$ .                                                               | <b>S15</b> |
| <b>XII</b>  | $[\text{}^1\text{H}, \text{}^{13}\text{C}]$ HSQC spectrum of <b>7</b> in neat THF- $d_8$ .                                                            | <b>S16</b> |
| <b>XIII</b> | $[\text{}^1\text{H}, \text{}^{13}\text{C}]$ HMBC spectrum of <b>7</b> in neat THF- $d_8$ .                                                            | <b>S17</b> |
| <b>XIV</b>  | $^1\text{H}$ NMR spectra of <b>8a</b> and <b>8b</b> in acetone- $d_6$ .                                                                               | <b>S18</b> |

|               |                                                                                                                                                                      |            |
|---------------|----------------------------------------------------------------------------------------------------------------------------------------------------------------------|------------|
| <b>XV</b>     | $^1\text{H}, ^{13}\text{C}$ ]HMBC spectrum of <b>8a</b> and <b>8b</b> in acetone- $d_6$ .                                                                            | <b>S19</b> |
| <b>XVI</b>    | $^1\text{H}, ^{13}\text{C}$ ]HMBC spectrum of <b>8a</b> and <b>8b</b> in acetone- $d_6$ with zoom on methyl region.                                                  | <b>S20</b> |
| <b>XVII</b>   | $^1\text{H}$ and $^{13}\text{C}$ NMR spectra of <b>9</b> in acetone- $d_6$ .                                                                                         | <b>S21</b> |
| <b>XVIII</b>  | $^1\text{H}$ and $^{13}\text{C}$ NMR spectra of <b>10</b> in acetone- $d_6$ .                                                                                        | <b>S22</b> |
| <b>XIX</b>    | $^1\text{H}, ^1\text{H}$ ]COSY spectrum of <b>10</b> in acetone- $d_6$ .                                                                                             | <b>S23</b> |
| <b>XX</b>     | $^1\text{H}, ^{13}\text{C}$ ]HSQC spectrum of <b>10</b> in acetone- $d_6$ .                                                                                          | <b>S24</b> |
| <b>XXI</b>    | $^1\text{H}, ^{13}\text{C}$ ]HMBC spectrum of <b>10</b> in acetone- $d_6$ .                                                                                          | <b>S25</b> |
| <b>XXII</b>   | $^{19}\text{F}$ NMR spectra of <b>1</b> with LDA in neat THF showing reaction to form <b>5</b> and <b>13</b> .                                                       | <b>S26</b> |
| <b>XXIII</b>  | $^1\text{H}$ and $^{13}\text{C}$ NMR spectra of <b>23</b> in neat THF- $d_8$ .                                                                                       | <b>S27</b> |
| <b>XXIV</b>   | $^1\text{H}^1\text{H}$ ]COSY spectrum of <b>23</b> in neat THF- $d_8$ .                                                                                              | <b>S28</b> |
| <b>XXV</b>    | $^1\text{H}, ^{13}\text{C}$ ]HMBC spectrum of <b>23</b> in neat THF- $d_8$ .                                                                                         | <b>S29</b> |
| <b>XXVI</b>   | $^1\text{H}, ^{13}\text{C}$ ]HSQC spectrum of <b>23</b> in neat THF- $d_8$ .                                                                                         | <b>S30</b> |
| <b>XXVII</b>  | Mass spectra of <b>9</b> and <b>9-<math>d_5</math></b> .                                                                                                             | <b>S31</b> |
| <b>XXVIII</b> | Mass spectra of <b>9</b> , <b>9-<math>d_2</math></b> , <b>9-<math>d_3</math></b> , and <b>9-<math>d_5</math></b> with zoom on M+ peak region.                        | <b>S32</b> |
| <b>XXIX</b>   | $^6\text{Li}$ NMR spectra of <b>6</b> in neat THF showing reaction to form <b>18</b> , <b>19</b> and <b>14</b> recorded at $-90\text{ }^\circ\text{C}$ .             | <b>S33</b> |
| <b>XXX</b>    | $^6\text{Li}$ NMR spectra of <b>6</b> in neat THF showing reaction to form <b>17</b> , <b>18</b> , and <b>14</b> recorded at $-50$ and $-40\text{ }^\circ\text{C}$ . | <b>S34</b> |
| <b>XXXI</b>   | $^6\text{Li}$ NMR spectra of [ $^6\text{Li}, ^{15}\text{N}$ ]LDA plus PhCN in neat THF.                                                                              | <b>S35</b> |
| <b>XXXII</b>  | $^6\text{Li}$ NMR spectra of <b>6</b> and [ $^6\text{Li}$ ]LDA in neat THF with the addition of <b>1</b> .                                                           | <b>S36</b> |
| <b>XXXIII</b> | $^{19}\text{F}$ NMR spectra of <b>6</b> with LDA in neat THF with the addition of <b>1</b> at $-40\text{ }^\circ\text{C}$ .                                          | <b>S37</b> |

|                |                                                                                                                                                  |            |
|----------------|--------------------------------------------------------------------------------------------------------------------------------------------------|------------|
| <b>XXXIV</b>   | Plot of $k_{\text{obsd}}$ vs [THF] in pentane for the deprotonation of <b>1</b> by LDA.                                                          | <b>S38</b> |
| <b>XXXV</b>    | Plot of $k_{\text{obsd}}$ vs [THF] in 2,2,5,5-Me <sub>4</sub> THF for the deprotonation of <b>1</b> by LDA.                                      | <b>S39</b> |
| <b>XXXVI</b>   | Plot of $k_{\text{obsd}}$ vs [LDA] in THF/pentane for the deprotonation of <b>1</b> by LDA.                                                      | <b>S40</b> |
| <b>XXXVII</b>  | Plot of $k_{\text{obsd}}$ vs [THF] in pentane for the deprotonation of <b>1</b> by LDA as determined following product formation via in situ IR. | <b>S41</b> |
| <b>XXXVIII</b> | Plot of $k_{\text{obsd}}$ vs [LDA] in THF for the deprotonation of <b>1</b> by LDA as determined following product formation via in situ IR.     | <b>S42</b> |
| <b>XXXIX</b>   | Plot of $k_{\text{obsd}}$ vs [LDA] in THF/pentane for the lithiation of PhCN by LDA as determined following product formation via in situ IR.    | <b>S43</b> |
| <b>XL</b>      | Plot of $k_{\text{obsd}}$ vs [THF] in pentane for the lithiation of PhCN by LDA as determined following product formation via in situ IR.        | <b>S44</b> |
| <b>XLI</b>     | X-Ray structure of compound <b>9</b> .                                                                                                           | <b>S45</b> |

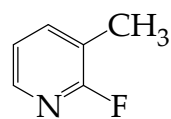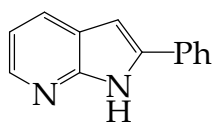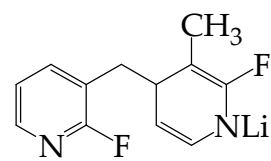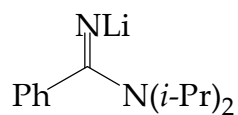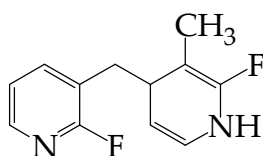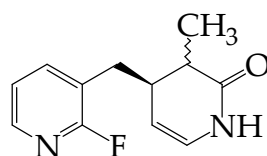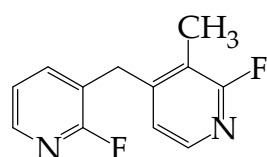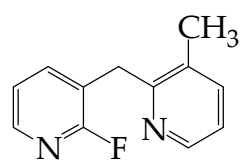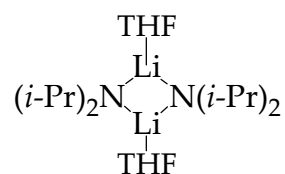

9

10

11

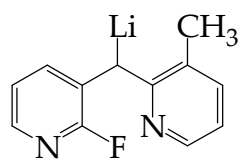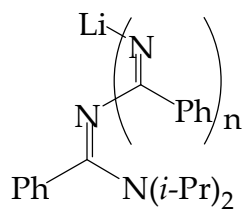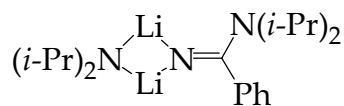

13

14

18

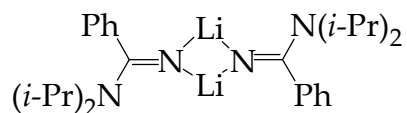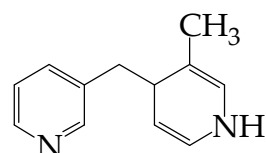

19

23

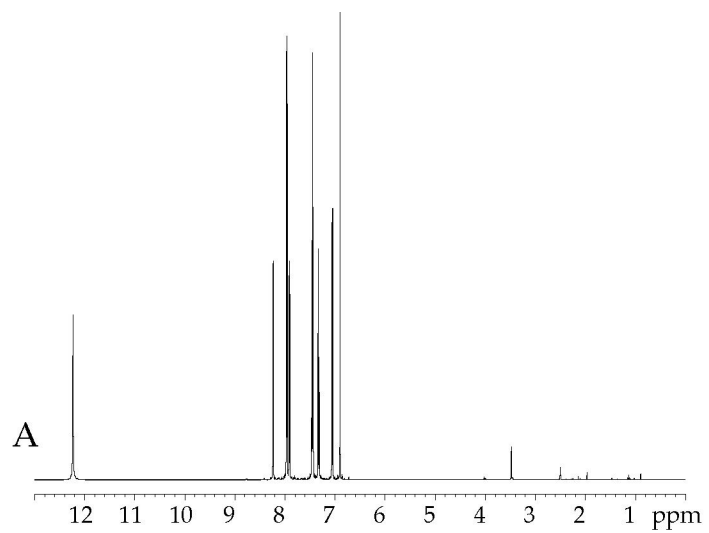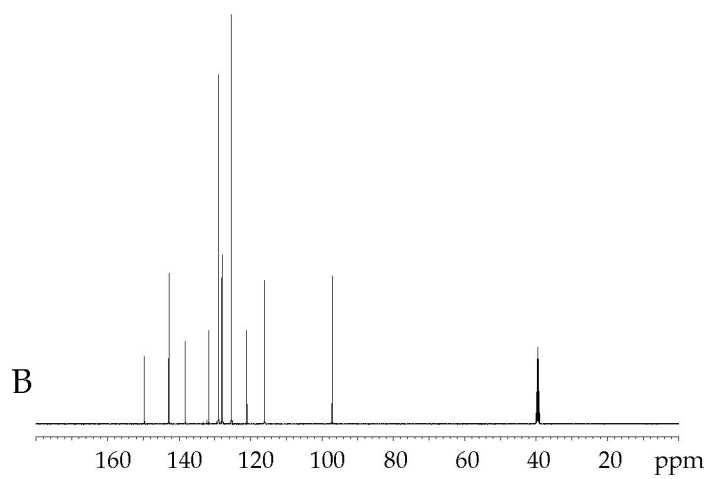

I. NMR spectra of **2** in DMSO- $d_6$ : (A)  $^1\text{H}$  NMR; and (B)  $^{13}\text{C}$  NMR.

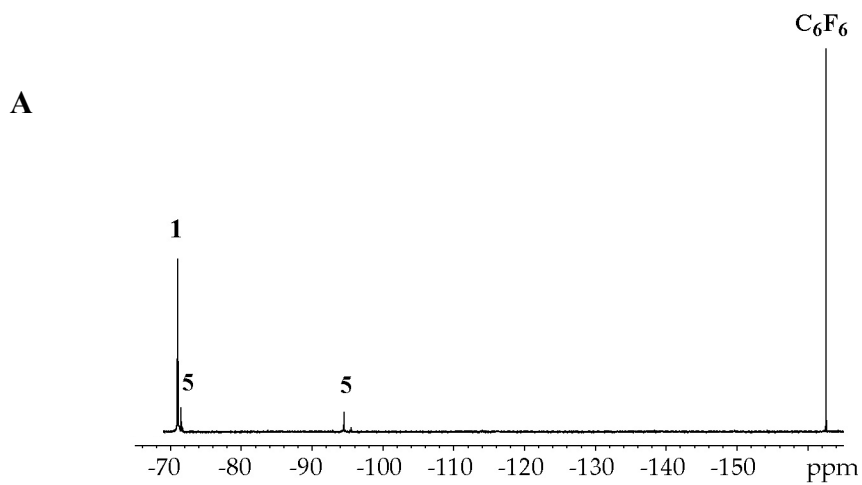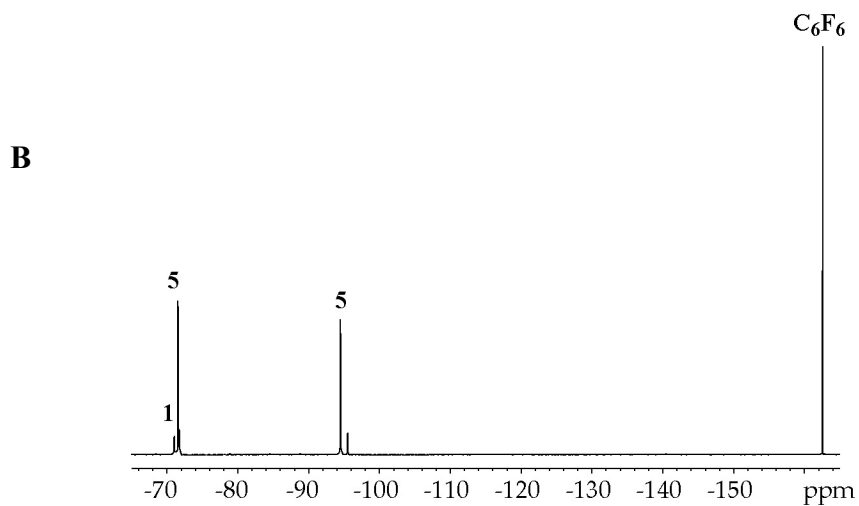

**II.**  $^{19}\text{F}$  NMR spectra of 0.10 M **1** with 0.10 M LDA in neat THF at  $-78\text{ }^\circ\text{C}$  showing reaction to form **5**. Hexafluorobenzene (0.60 M in neat THF) is included as an internal standard in a sealed capillary tube. Spectra were recorded (**A**) after 30 s aging at  $-40\text{ }^\circ\text{C}$ ; and (**B**) after 10 min aging at  $-40\text{ }^\circ\text{C}$ .

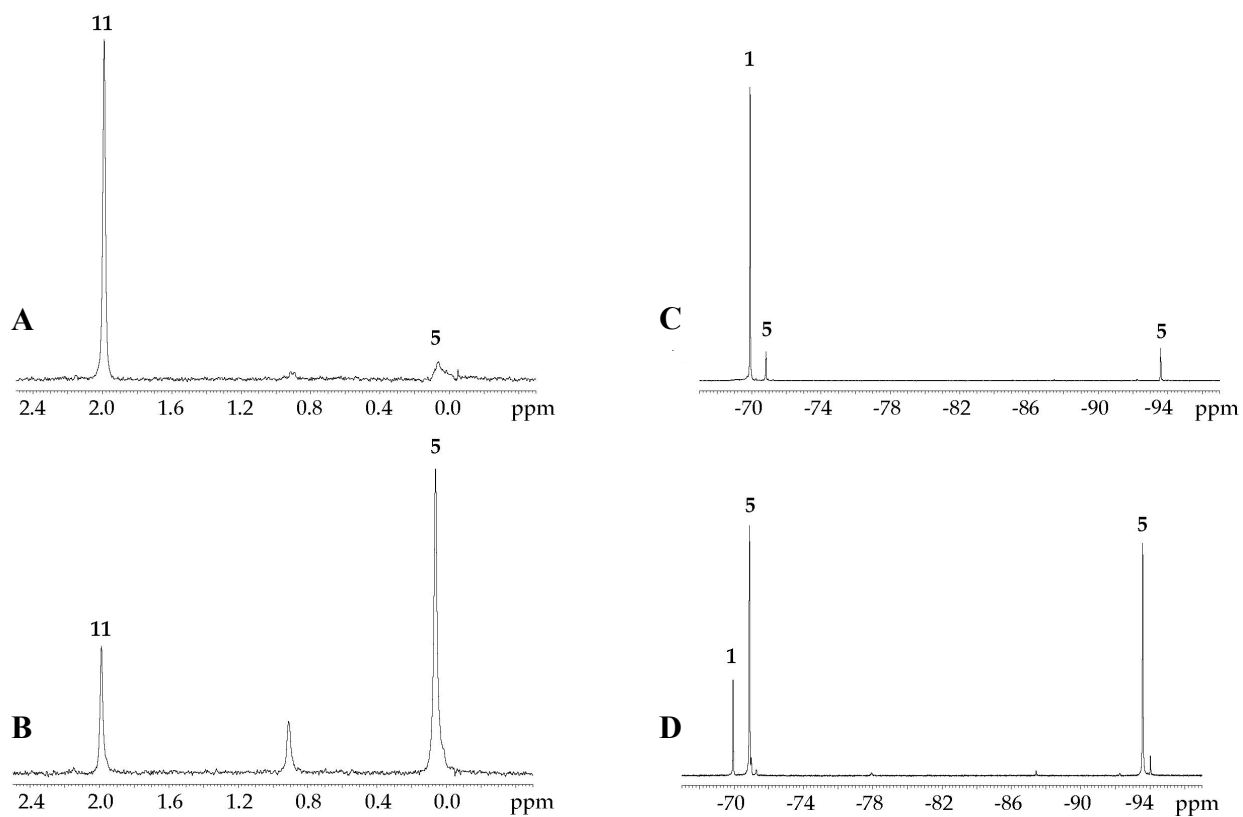

**III.**  $^6\text{Li}$  and  $^{19}\text{F}$  NMR spectra of 0.30 M **1** with 0.30 M [ $^6\text{Li}$ ]LDA in neat THF at  $-78\text{ }^\circ\text{C}$  showing reaction to form **5**. Spectra were recorded as follows: (A)  $^6\text{Li}$  spectrum at  $-40\text{ }^\circ\text{C}$  after 10 s aging; (B)  $^6\text{Li}$  spectrum at  $-40\text{ }^\circ\text{C}$  after 3 min aging; (C)  $^{19}\text{F}$  spectrum at  $-40\text{ }^\circ\text{C}$  after 10 s aging; and (D)  $^{19}\text{F}$  spectrum at  $-40\text{ }^\circ\text{C}$  after 3 min aging.

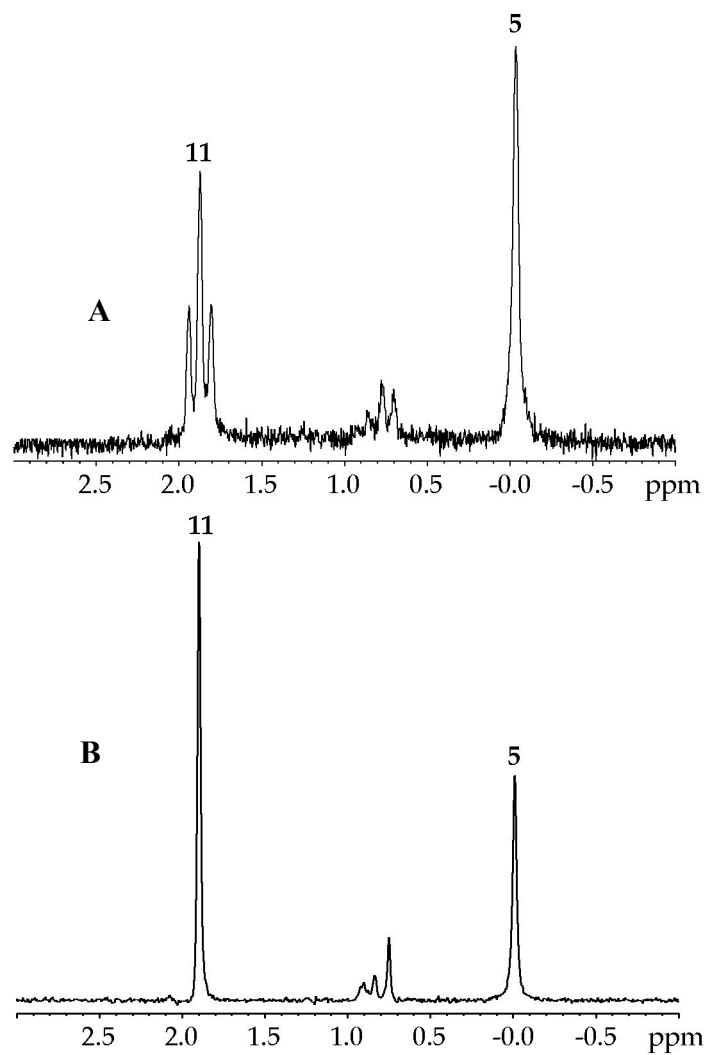

**IV.**  ${}^6\text{Li}$  NMR spectra of 0.30 M **1** with 0.30 M [ ${}^6\text{Li}$ ,  ${}^{15}\text{N}$ ]LDA in neat THF recorded at  $-78\text{ }^\circ\text{C}$  after aging at  $-55\text{ }^\circ\text{C}$  for 1 h showing no  ${}^6\text{Li}$ - ${}^{15}\text{N}$  coupling of **5**. (A)  ${}^6\text{Li}$  spectrum and (B)  ${}^6\text{Li}\{{}^{15}\text{N}\}$  spectrum.



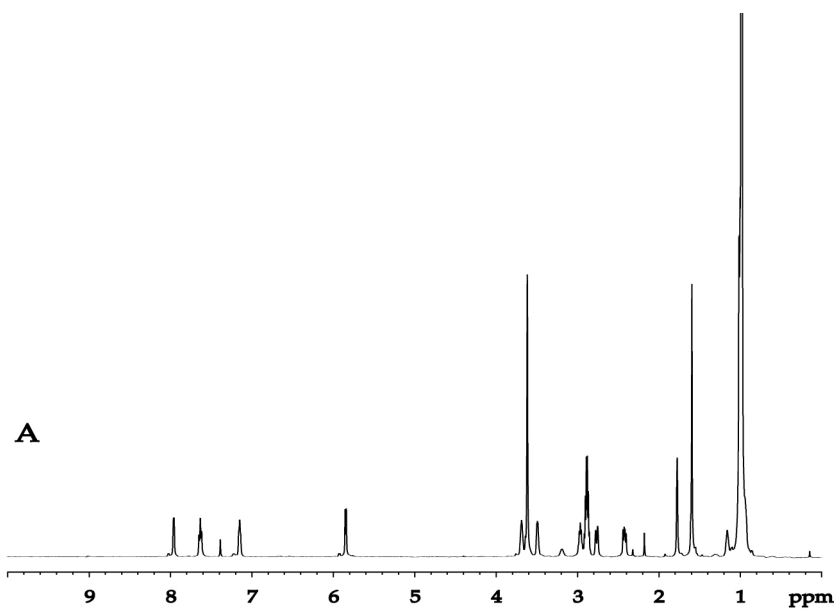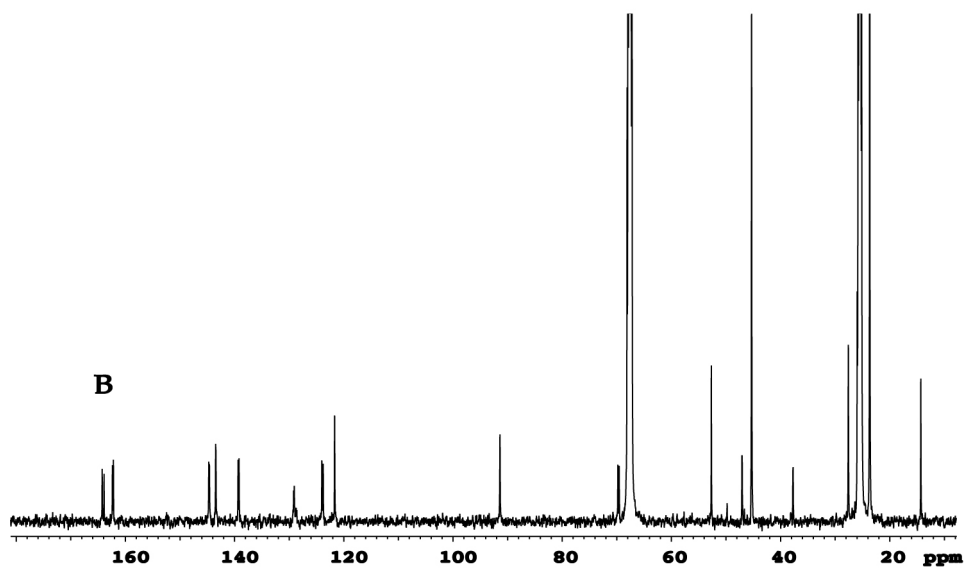

V.  $^1\text{H}$  NMR spectra of 0.10 M **1** with 0.10 M LDA in neat THF at  $-78\text{ }^\circ\text{C}$  showing reaction to form **5**. (A)  $^1\text{H}$  NMR spectra were recorded after 30 min aging at  $-40\text{ }^\circ\text{C}$ ; and (B)  $^{13}\text{C}$  NMR spectra were recorded after 30 min aging at  $-40\text{ }^\circ\text{C}$ .

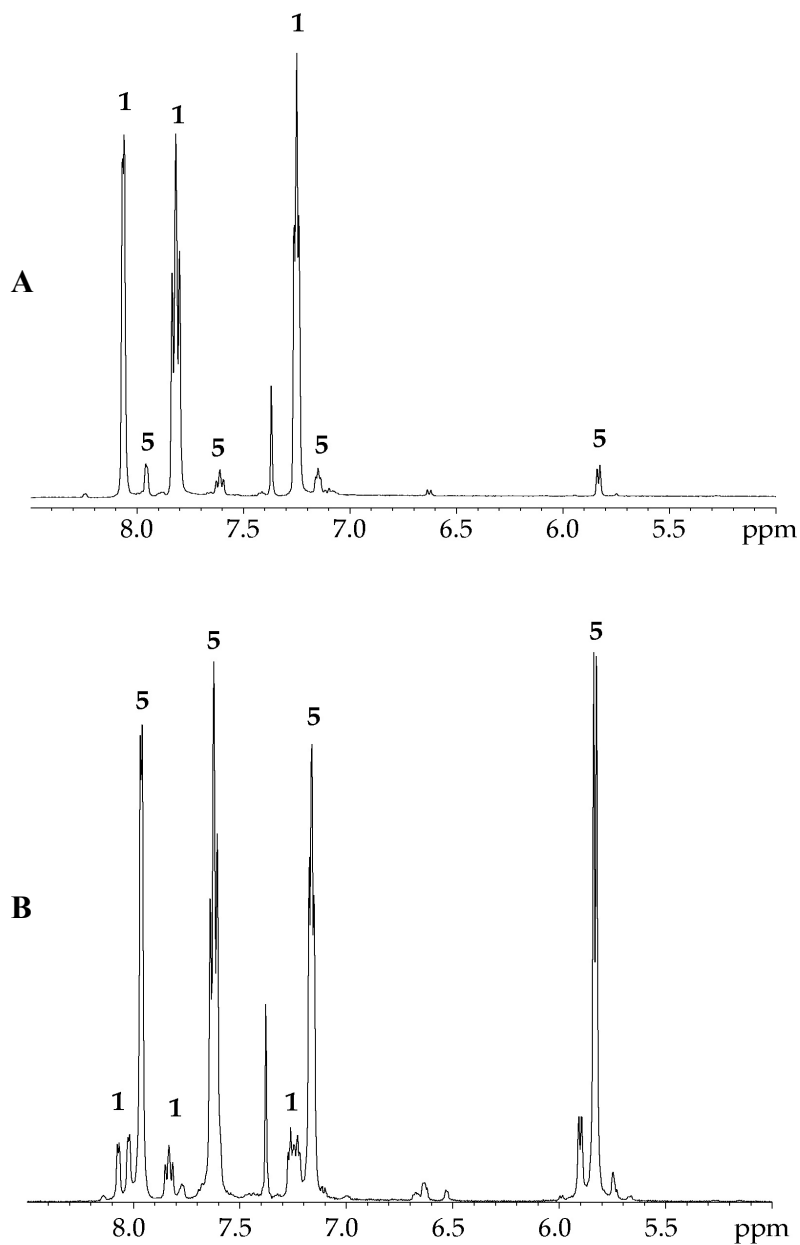

**VI.**  $^1\text{H}$  NMR spectra of 0.30 M **1** with 0.30 M LDA in neat THF at  $-78\text{ }^\circ\text{C}$  showing reaction to form **5**. Only aromatic and vinylic regions are included for clarity. Spectra were recorded (A) after 30 s aging at  $-40\text{ }^\circ\text{C}$ ; and (B) after 10 min aging at  $-40\text{ }^\circ\text{C}$ .

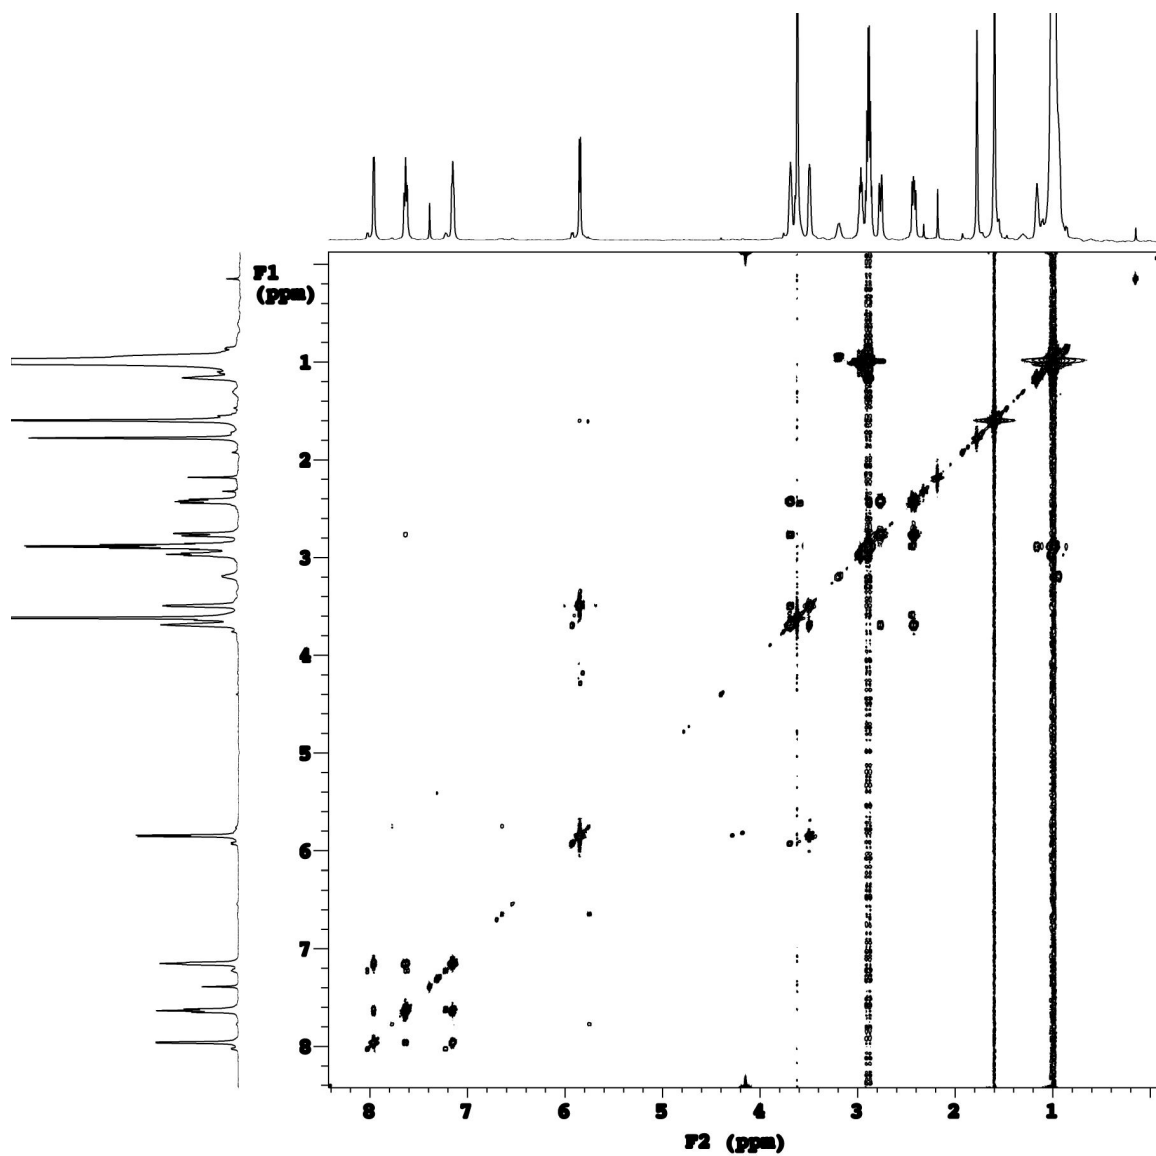

VII. [<sup>1</sup>H,<sup>1</sup>H]COSY NMR spectrum of 0.10 M **1** with 0.10 M LDA in neat THF-*d*<sub>8</sub> at -78 °C showing reaction to form **5**. The spectrum was recorded after 30 min aging at -40 °C.

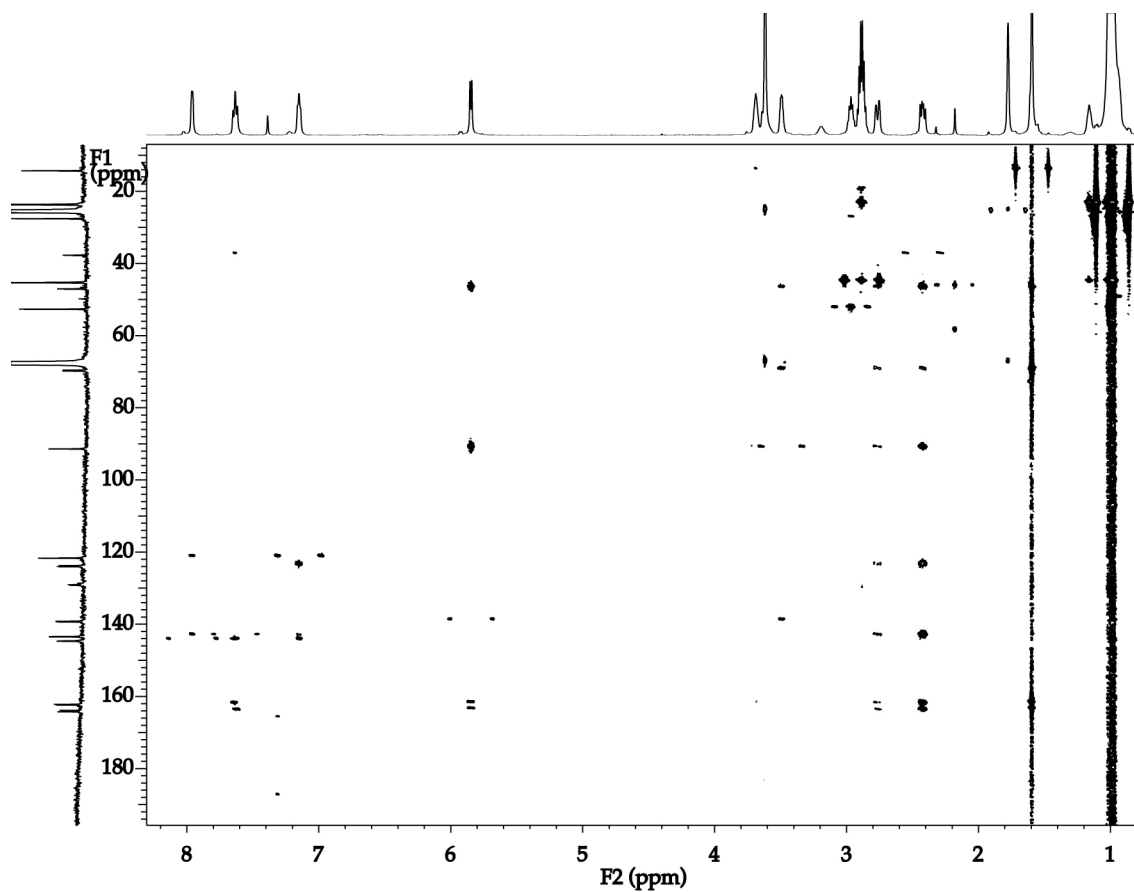

**VIII.** [ $^1\text{H}$ ,  $^{13}\text{C}$ ]HMBC NMR spectrum of **5** revealing long range  $^1\text{H}$ - $^{13}\text{C}$  heteronuclear correlation. The sample was prepared with 0.10 M **1** with 0.10 M LDA in neat THF at  $-78\text{ }^\circ\text{C}$ . The spectrum was recorded after 30 min aging at  $-40\text{ }^\circ\text{C}$ .

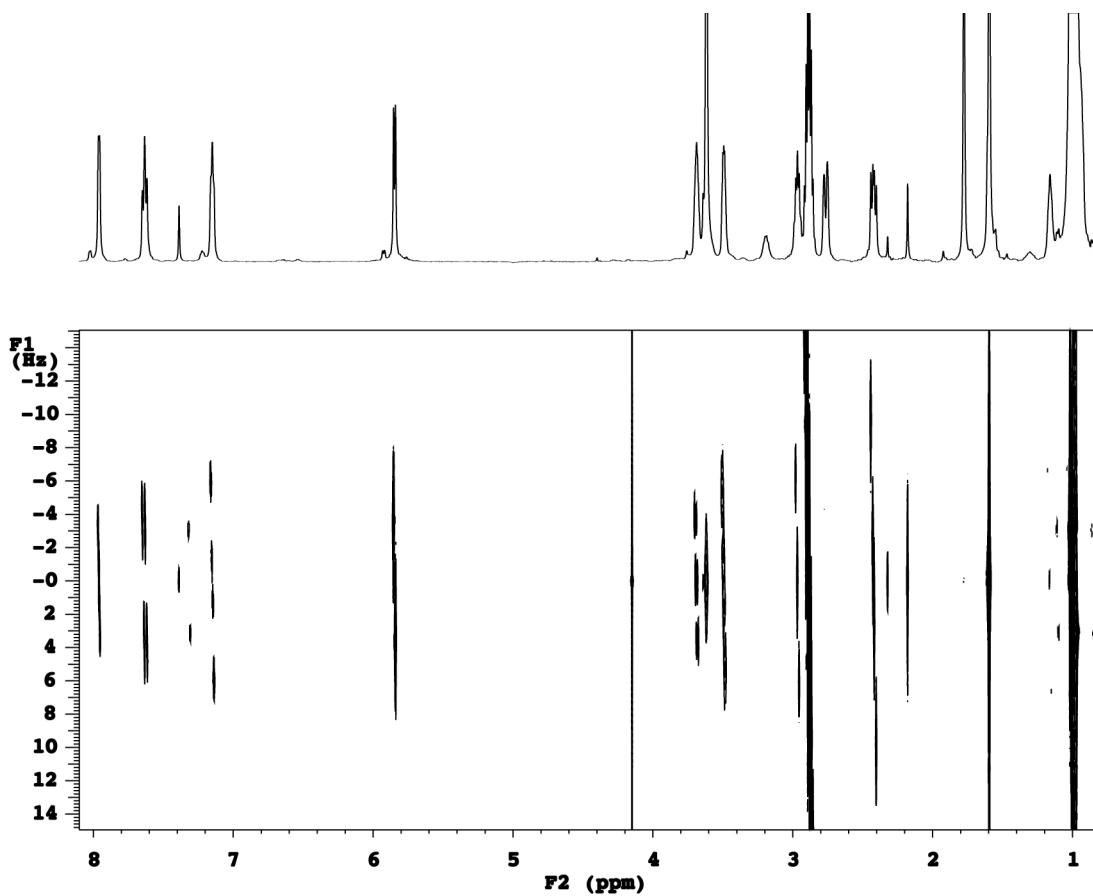

IX.  $J\{\text{}^1\text{H}, \text{}^{19}\text{F}\}$ -resolved spectrum of **5**. The sample was prepared with 0.10 M **1** with 0.10 M LDA in neat THF at  $-78\text{ }^\circ\text{C}$ . The spectrum was recorded after 30 min aging at  $-40\text{ }^\circ\text{C}$ .

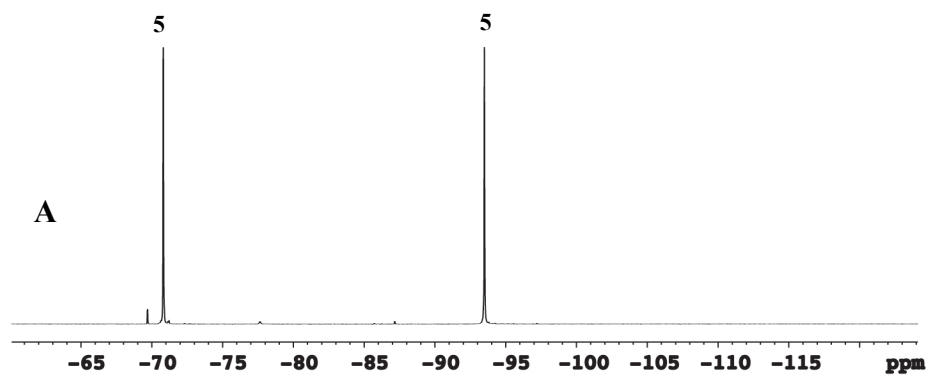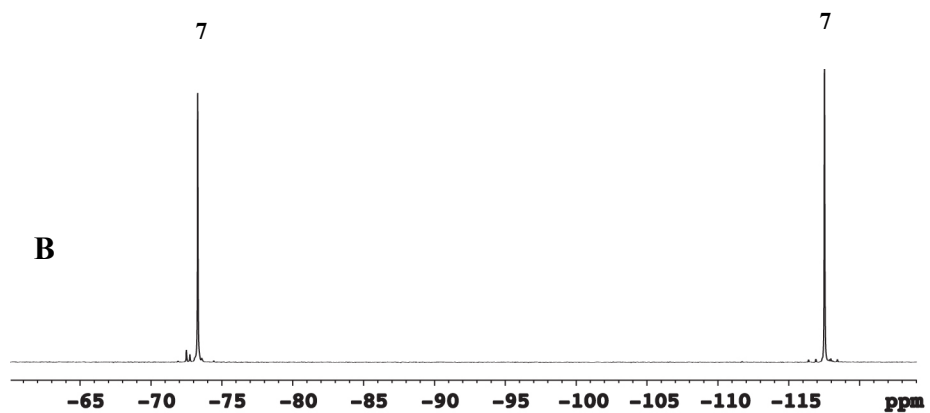

X.  $^{19}\text{F}$  NMR spectra: (A) after complete reaction of **1** with LDA to form **5** at  $-40\text{ }^\circ\text{C}$ ; and (B) immediately after quench of sample with  $\text{H}_2\text{O}/\text{THF}$  at  $-40\text{ }^\circ\text{C}$  to form dihydropyridine **7**.

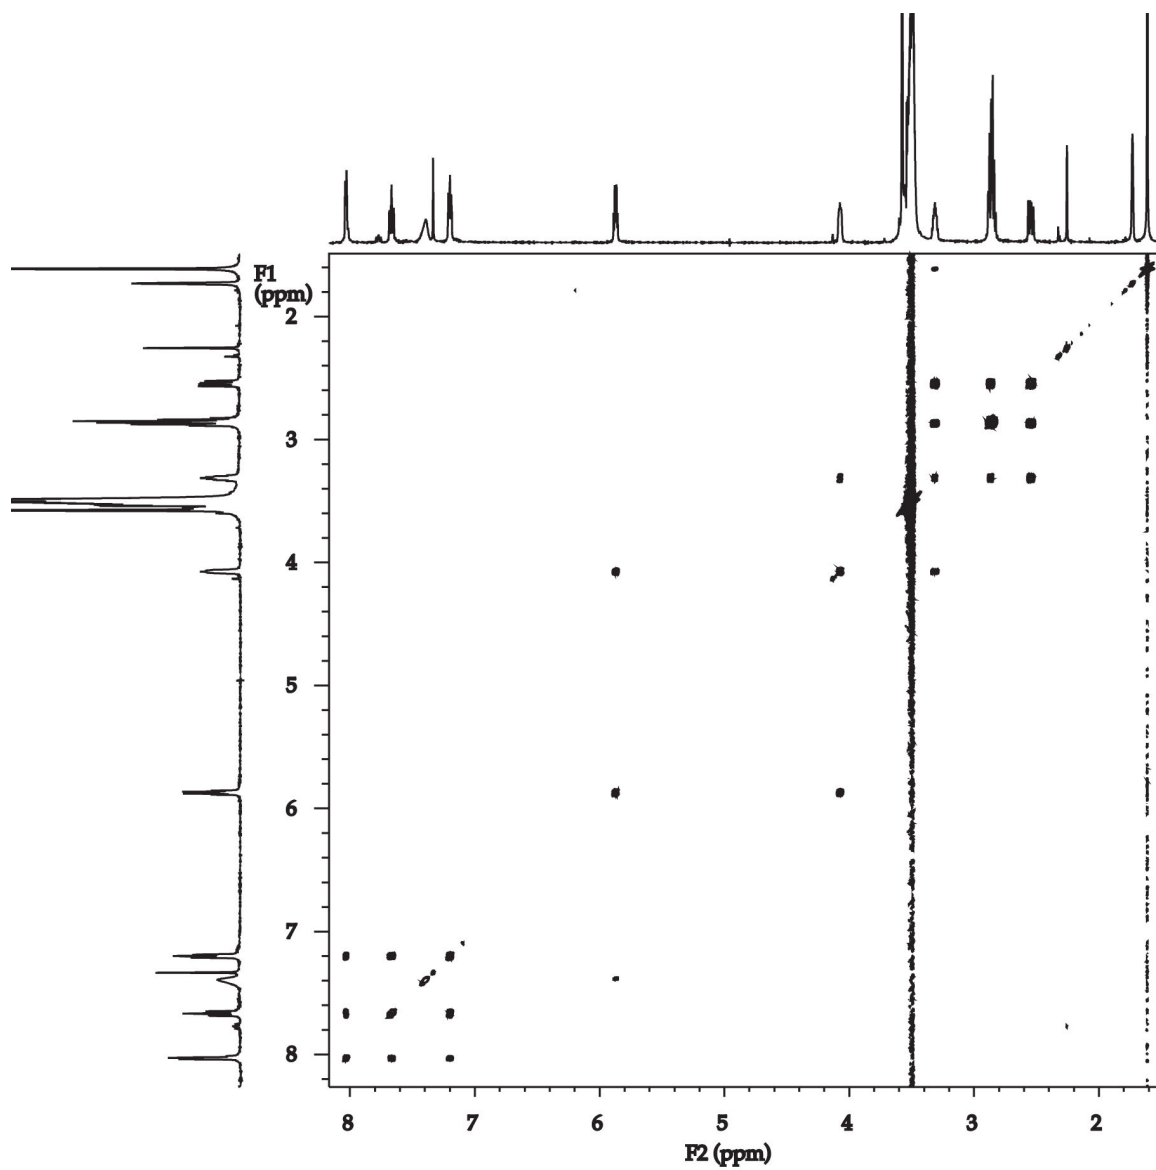

XI. [ $^1\text{H}, ^1\text{H}$ ]COSY NMR spectrum of **7** recorded in neat THF- $d_8$  at  $-70\text{ }^\circ\text{C}$ .

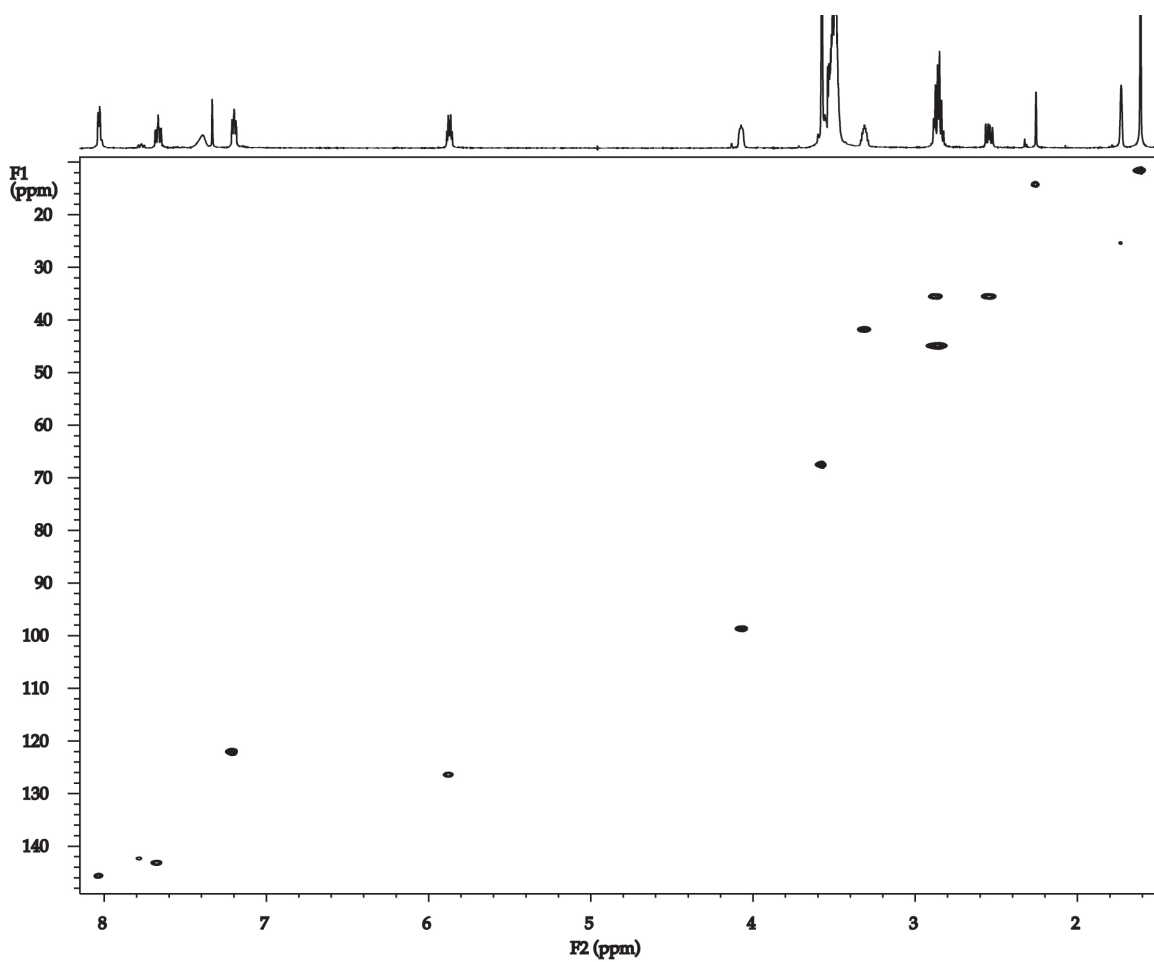

XII. [ $^1\text{H}$ ,  $^{13}\text{C}$ ]HSQC NMR spectrum of **7** recorded in neat  $\text{THF-}d_8$  at  $-70\text{ }^\circ\text{C}$ .



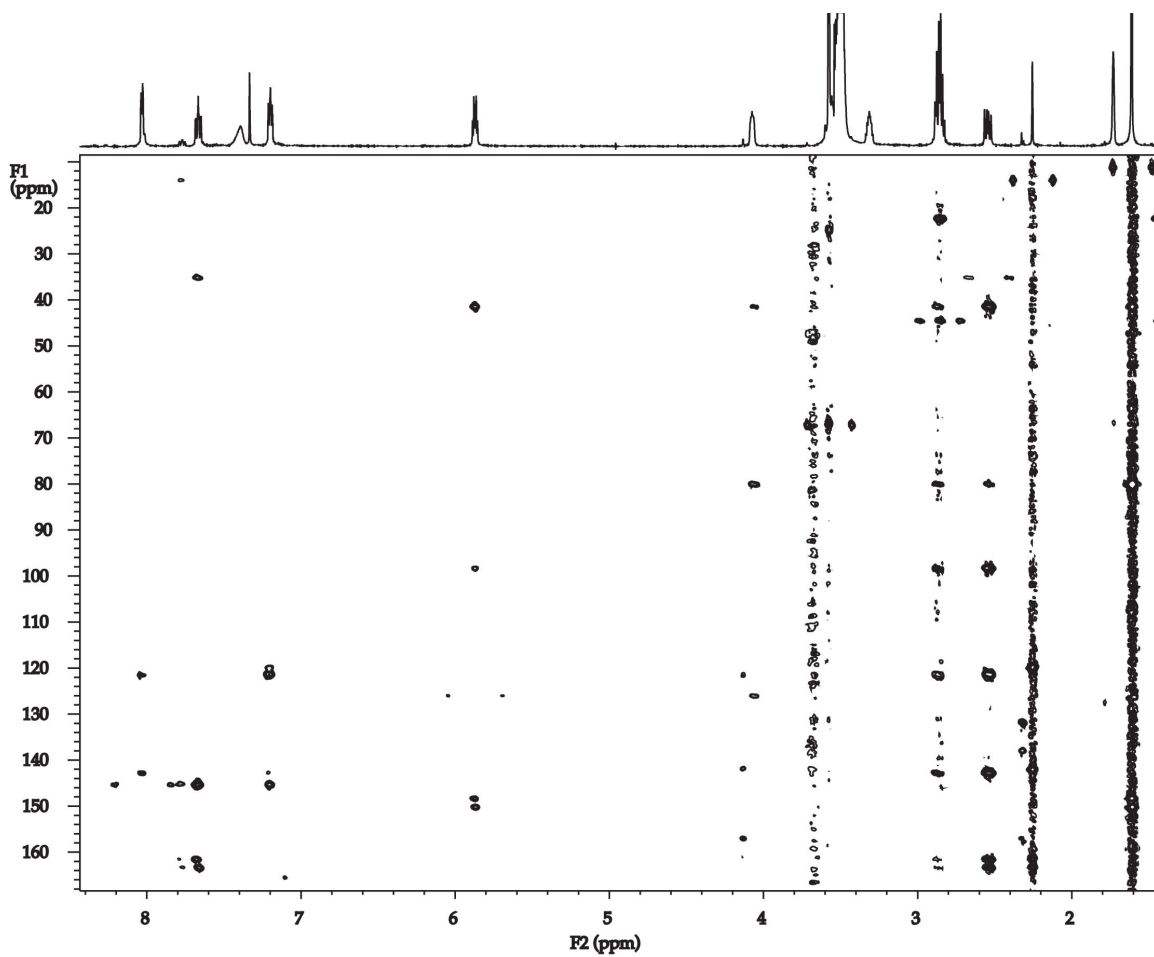

XIII. [ $^1\text{H}$ ,  $^{13}\text{C}$ ]HMBC NMR spectrum of **7** recorded in neat  $\text{THF-}d_8$  at  $-70\text{ }^\circ\text{C}$ .

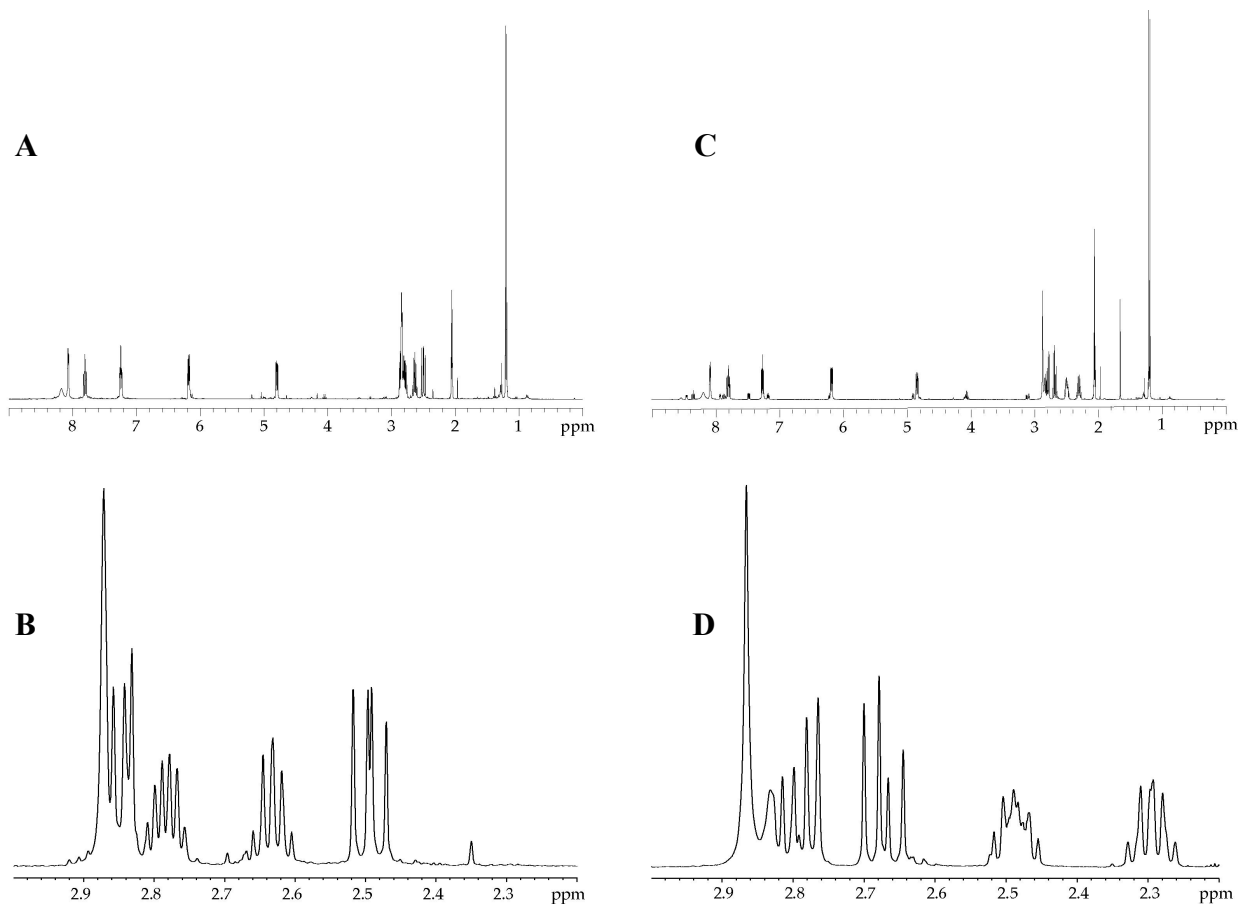

**XIV.**  $^1\text{H}$  NMR spectra of major and minor diastereomers **8a** and **8b** in acetone- $d_6$ . **(A)** pure **8a**; **(B)** expansion of methylene region of **(A)**; **(C)** pure **8b**; and **(D)** expansion of methylene region of **(C)**.

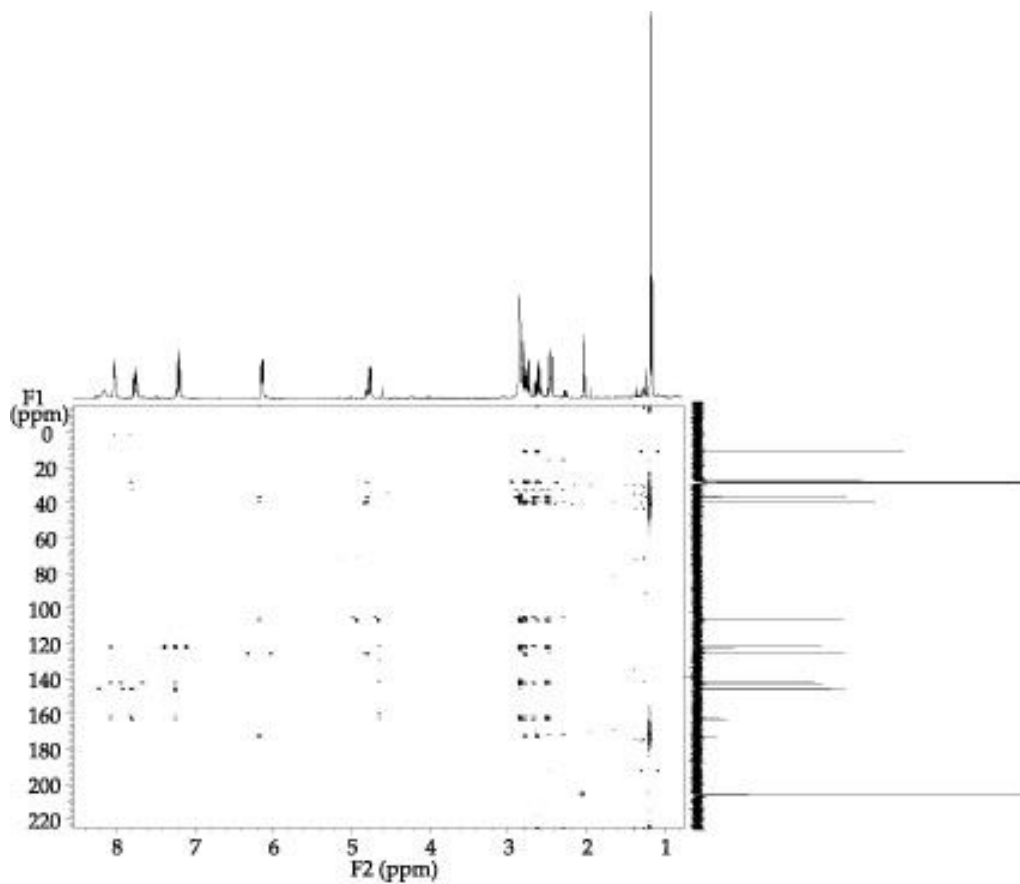

XV. [ $^1\text{H}$ ,  $^{13}\text{C}$ ]HMBC NMR spectrum revealing long range  $^1\text{H}$ - $^{13}\text{C}$  heteronuclear correlation in a 3:1 mixture of diastereomer **8a** and **8b** in acetone- $d_6$ .

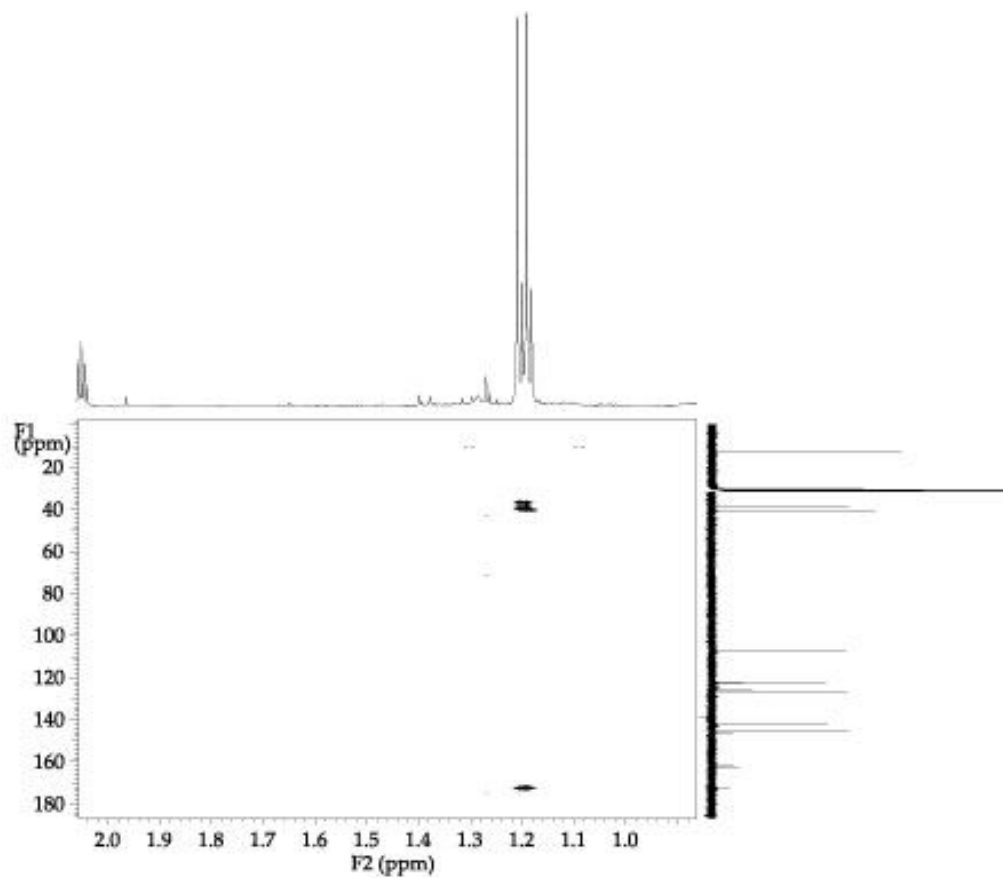

**XVI.** [ $^1\text{H}$ ,  $^{13}\text{C}$ ]HMBC NMR spectrum revealing long range  $^1\text{H}$ - $^{13}\text{C}$  heteronuclear correlation in a 3:1 mixture of diastereomer **8a** and **8b** in acetone- $d_6$ .  $^1\text{H}$  dimension zoomed in on methyl region to highlight lack of  $^1\text{H}$  methyl- $^{13}\text{C}$  vinyl long range correlation.

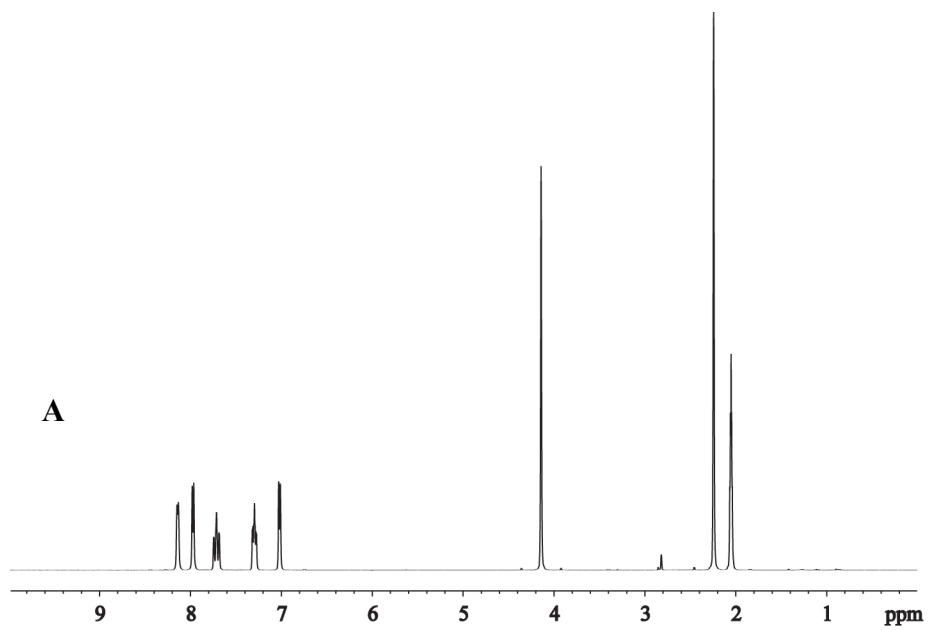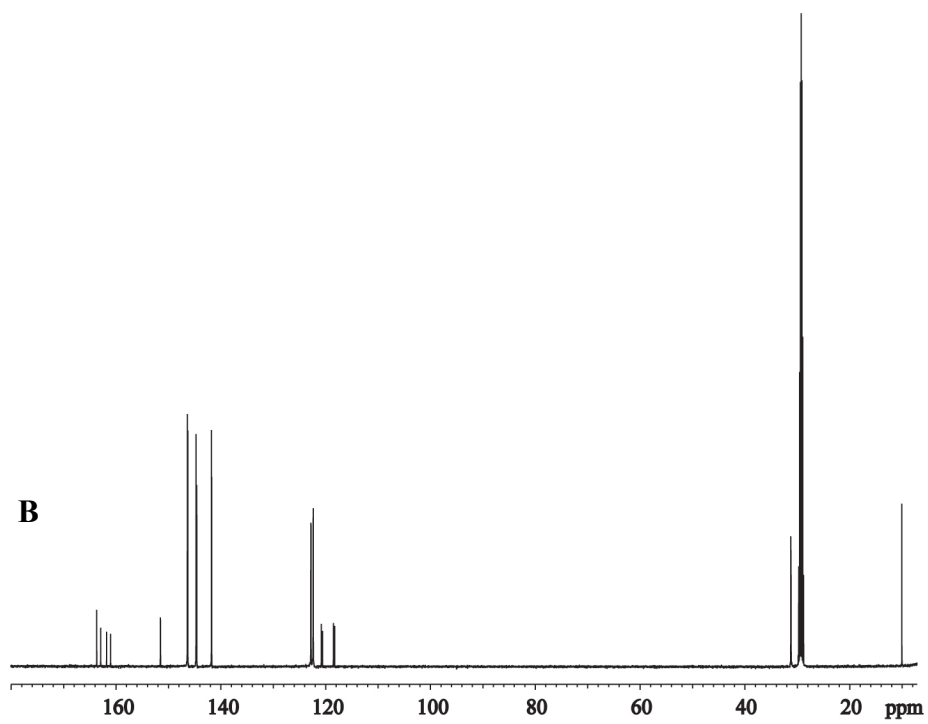

**XVII.** NMR spectra of aromatized 1,4-dimer **9** in acetone- $d_6$ : (A)  $^1\text{H}$  spectrum; and (B)  $^{13}\text{C}$  spectrum.

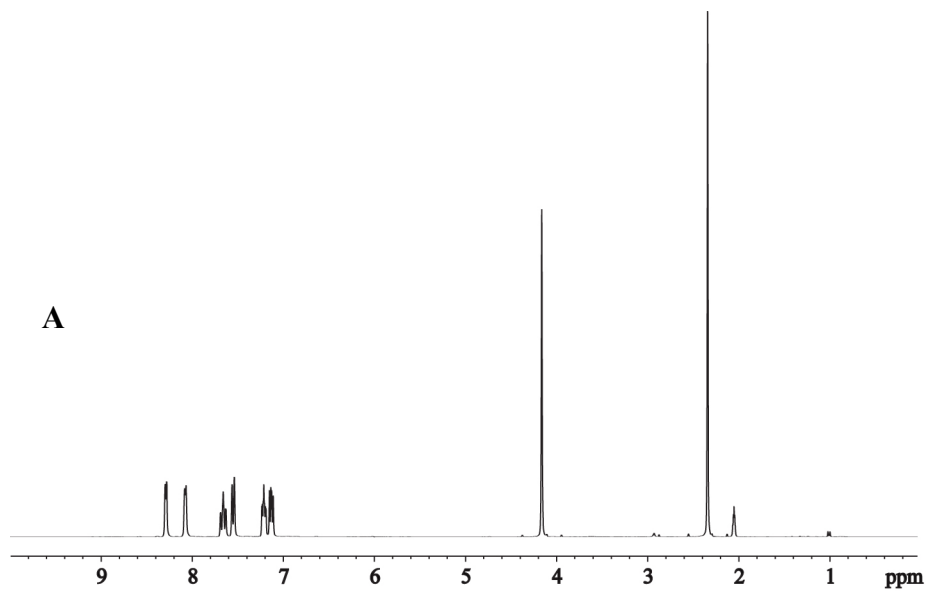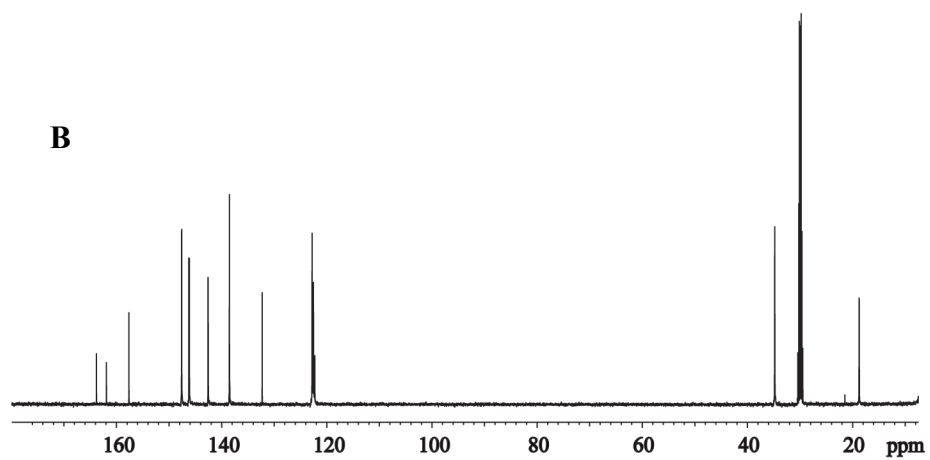

**XVIII.** NMR spectra of **10** in acetone- $d_6$ : (A)  $^1\text{H}$  spectrum; and (B)  $^{13}\text{C}$  spectrum.

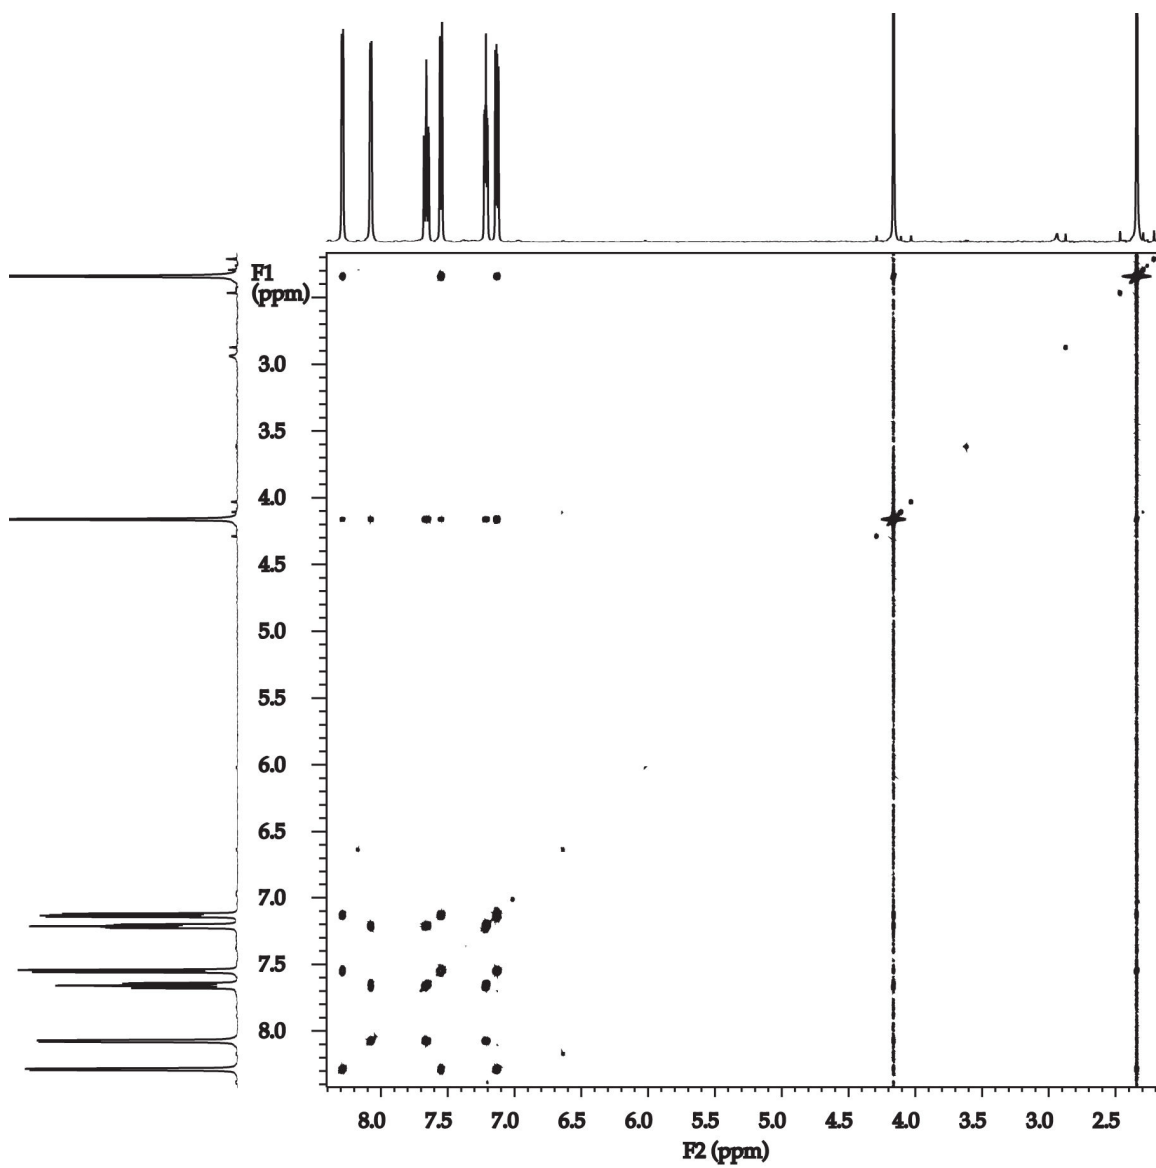

XIX.  $[\text{}^1\text{H}, \text{}^1\text{H}]$ COSY NMR spectrum of **10** recorded in acetone- $d_6$  at 20 °C.

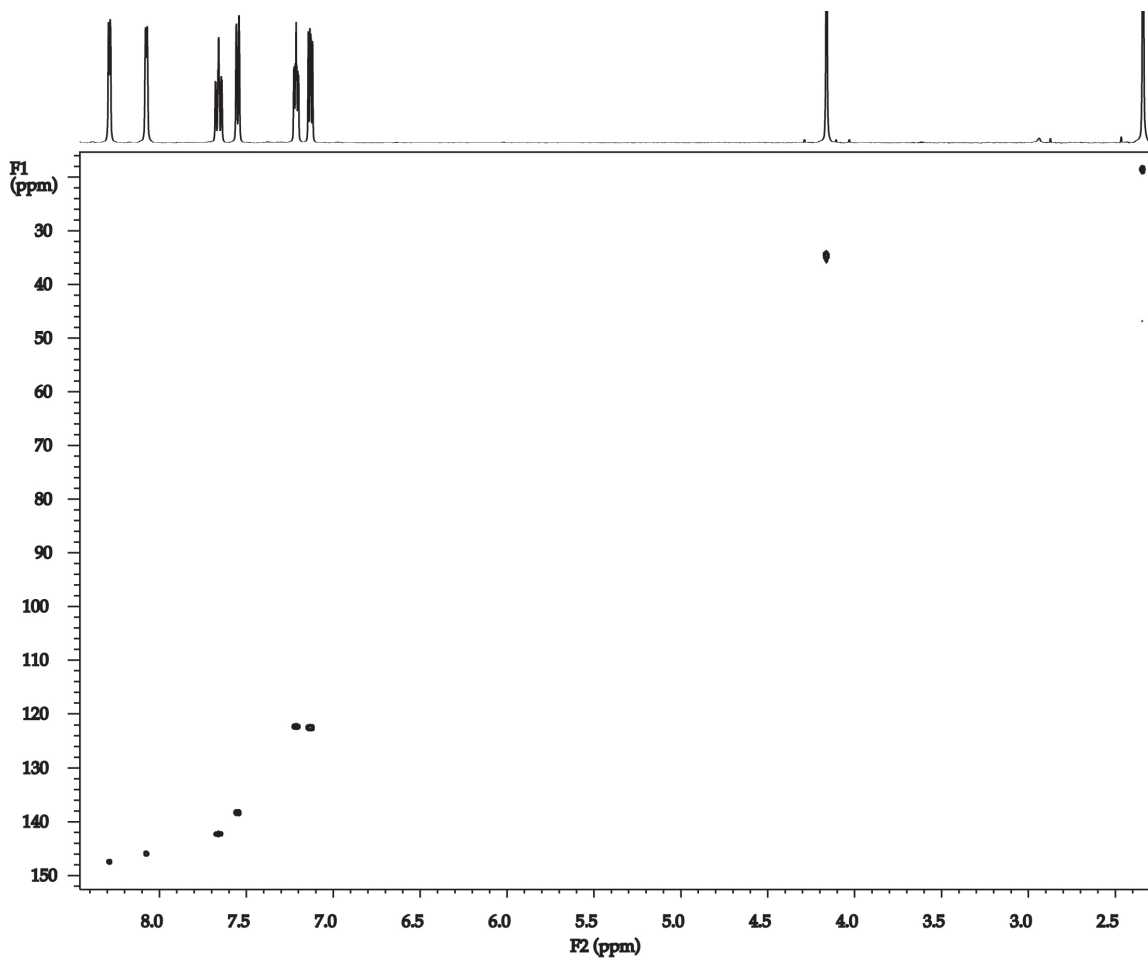

XX.  $[\text{}^1\text{H}, \text{}^{13}\text{C}]$ HSQC NMR spectrum of **10** recorded in acetone- $d_6$  at 20 °C.



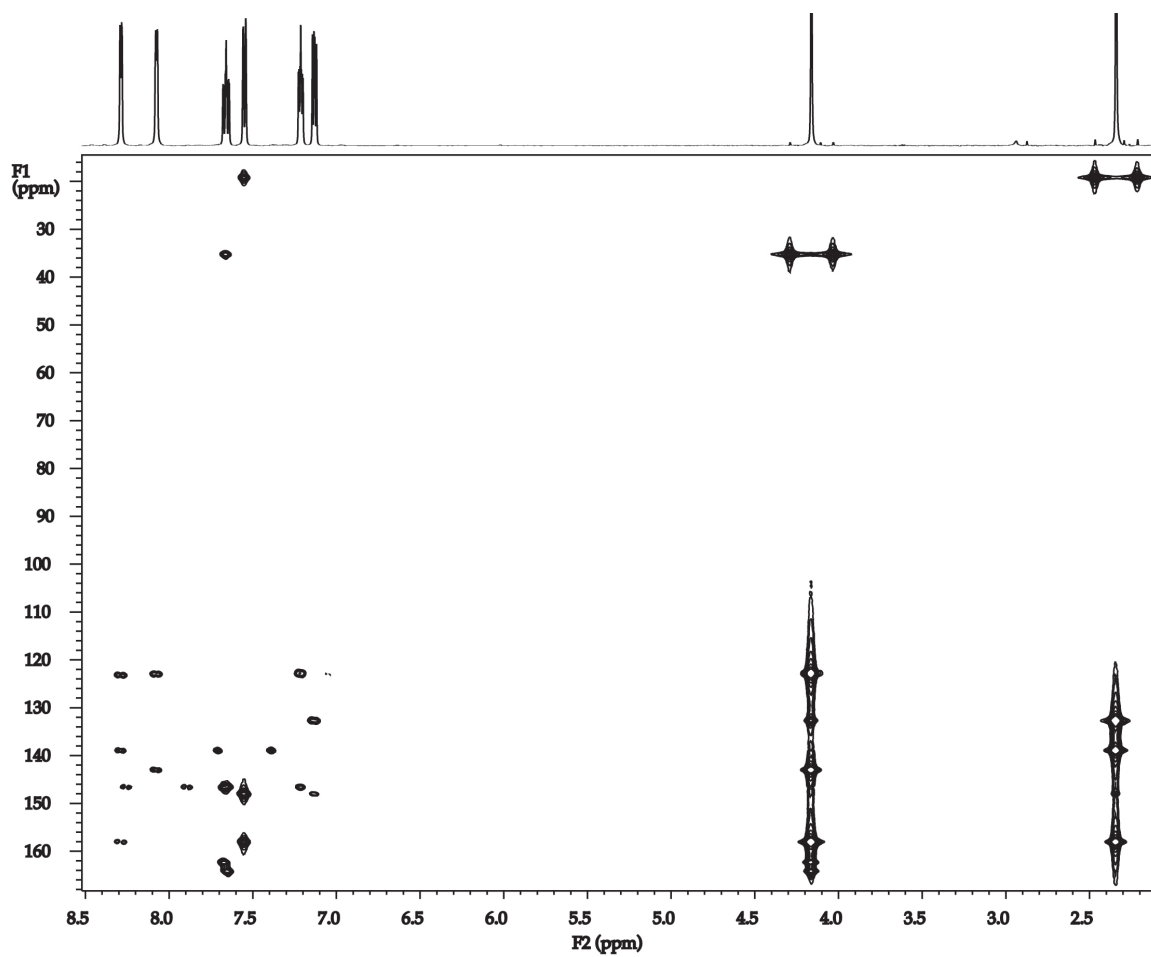

XXI. [ $^1\text{H}$ ,  $^{13}\text{C}$ ]HMBC NMR spectrum of **10** recorded in acetone- $d_6$  at 20 °C.

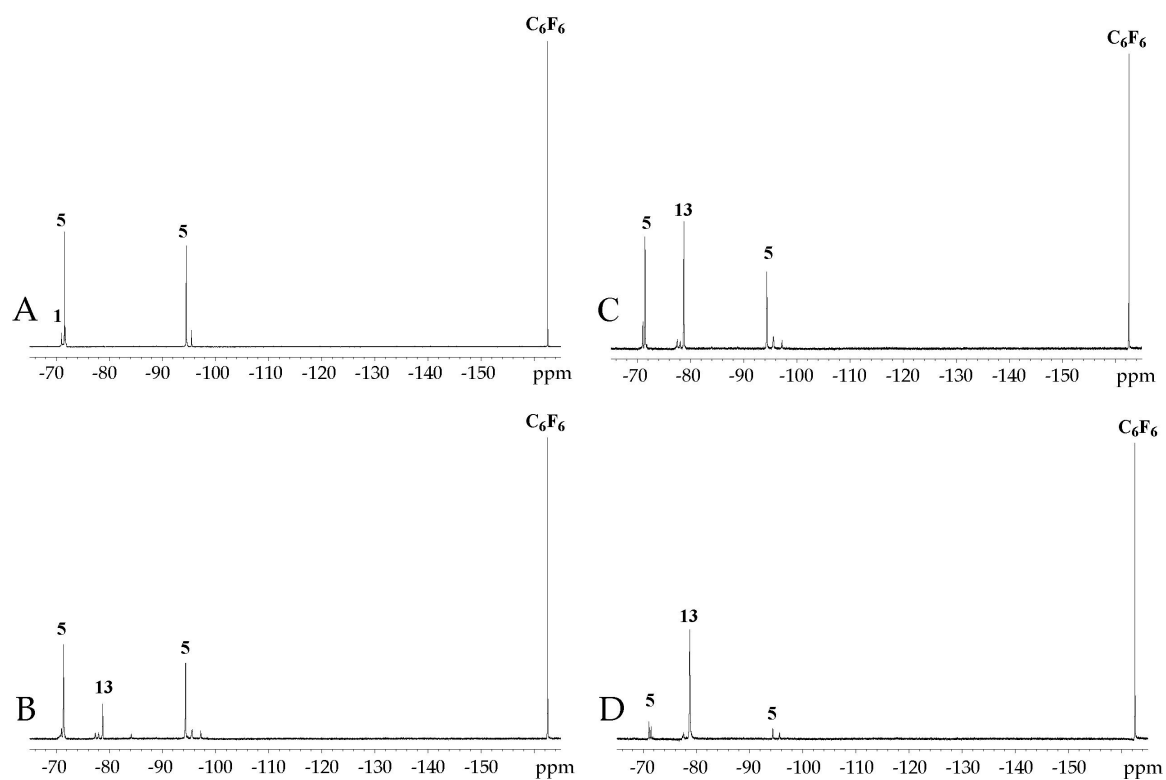

**XXII.**  $^{19}\text{F}$  NMR spectra of 0.10 M **1** with 0.10 M LDA in neat THF at  $-78\text{ }^{\circ}\text{C}$  showing reaction to form **5** and **13**. (A) Before aging; (B) after aging at  $0\text{ }^{\circ}\text{C}$  for 1 min; (C) after aging at  $0\text{ }^{\circ}\text{C}$  for 3 min; and (D) after aging at  $0\text{ }^{\circ}\text{C}$  for 15 min.

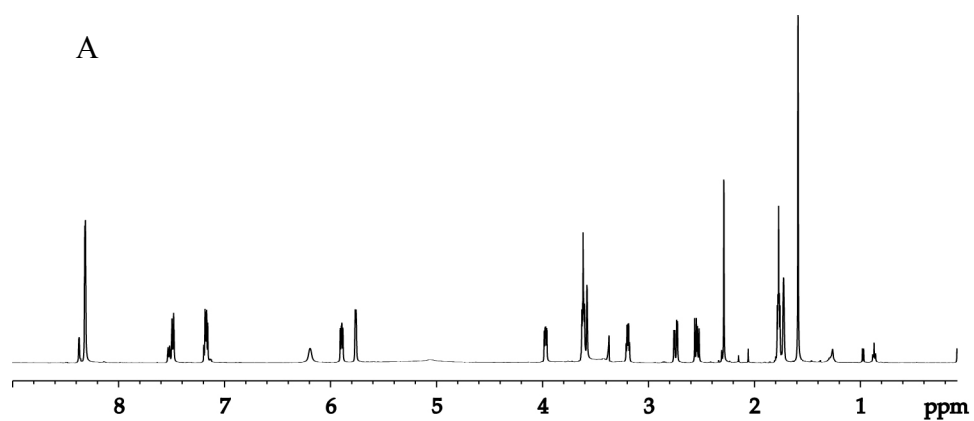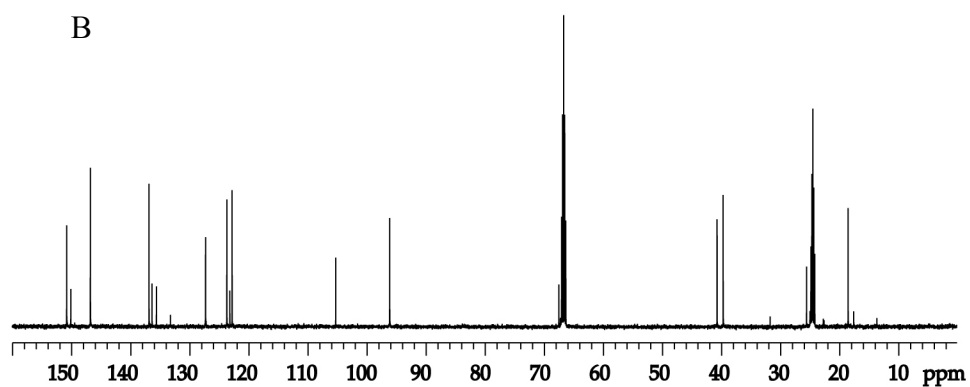

**XXIII.** (A)  $^1\text{H}$  NMR spectrum of **23** was recorded in  $\text{THF-}d_8$  after 30 min aging at  $-40^\circ\text{C}$ ; and (B)  $^{13}\text{C}$  NMR spectrum of **23** was recorded in  $\text{THF-}d_8$  after 30 min aging at  $-40^\circ\text{C}$ .

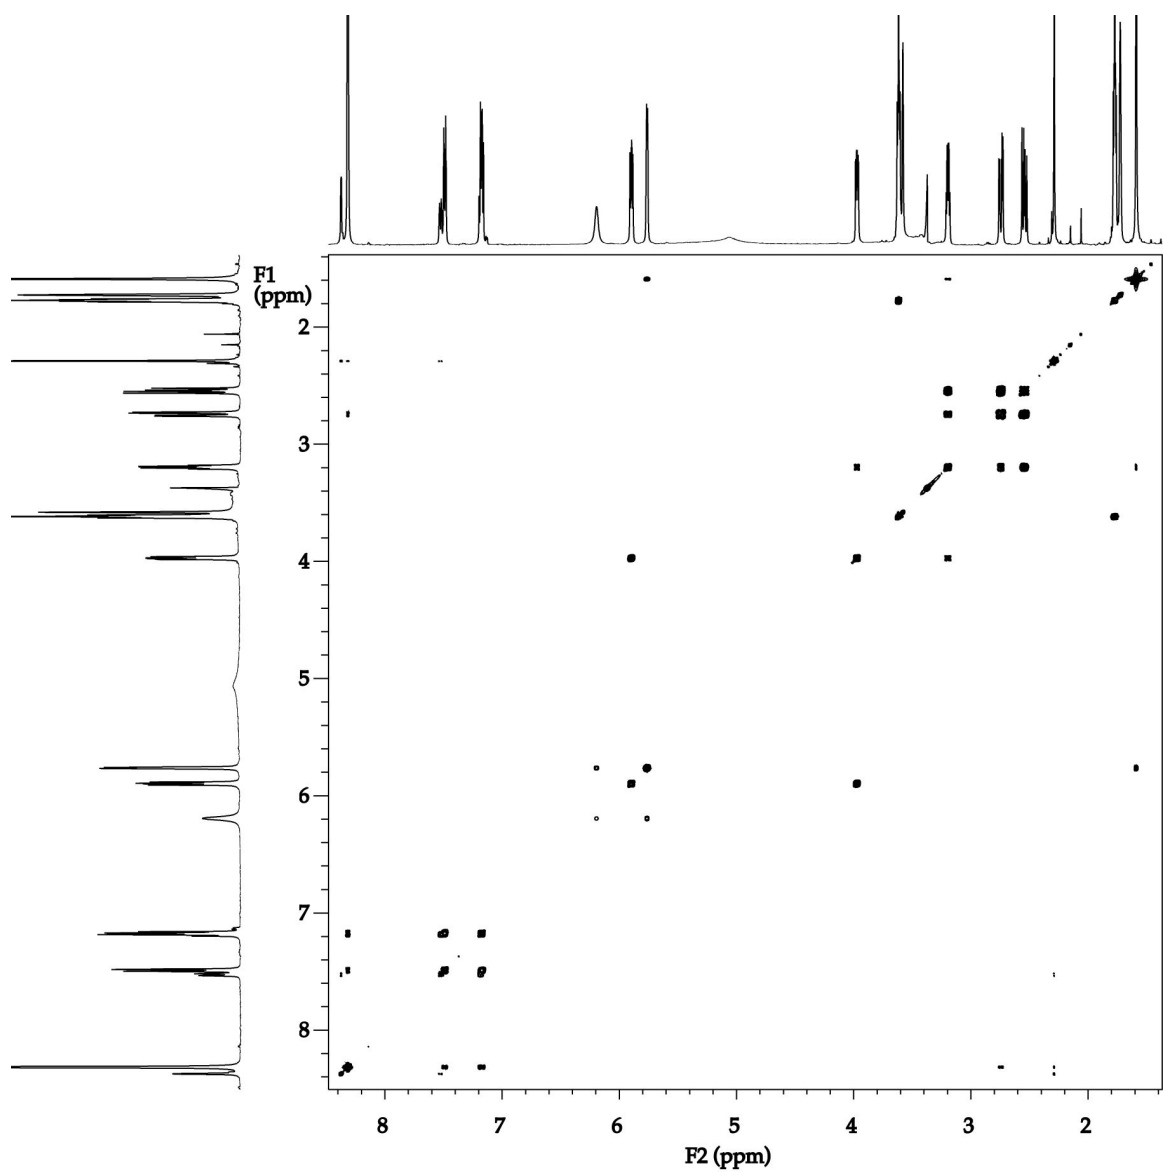

XXIV. [ $^1\text{H}, ^1\text{H}$ ]COSY NMR spectrum of **23** recorded in neat THF- $d_8$  at 20 °C.

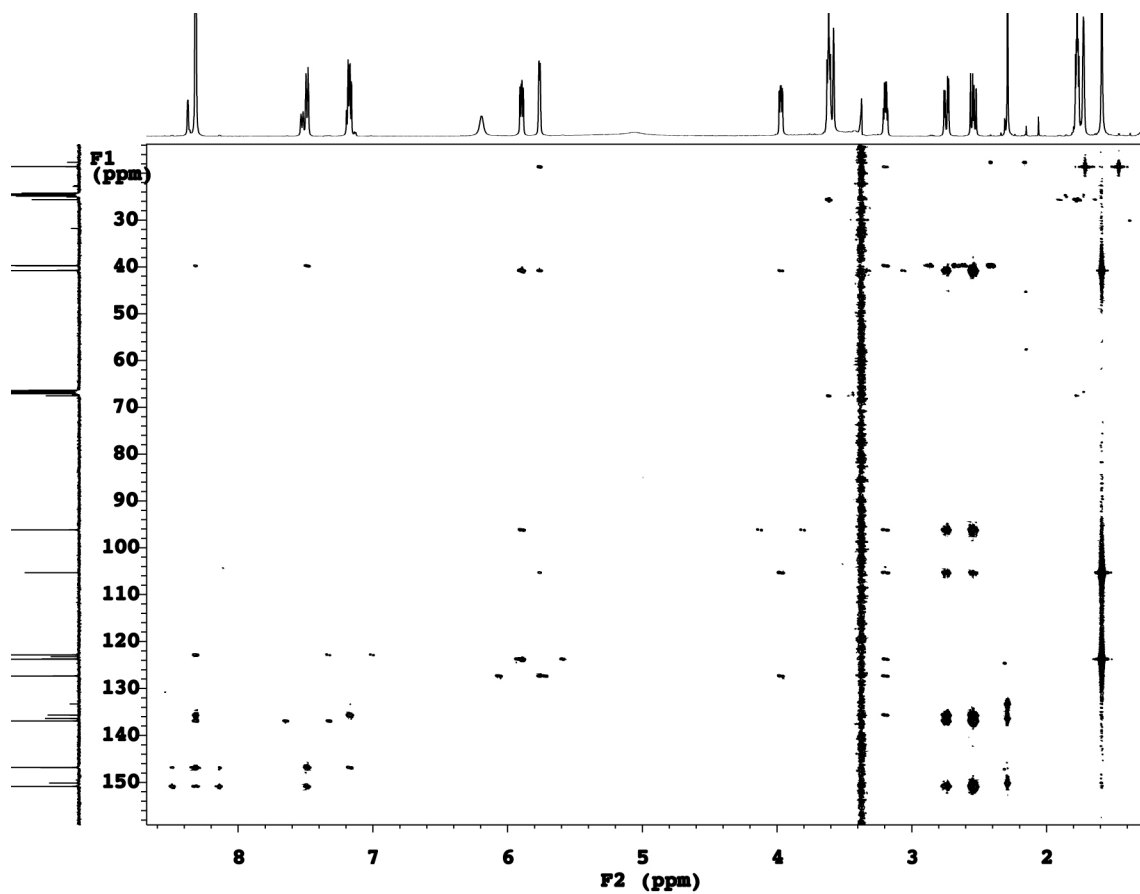

XXV.  $[\text{}^1\text{H}, \text{}^{13}\text{C}]$ HMBC NMR spectrum of **23** recorded in neat THF- $d_8$  at 20 °C.

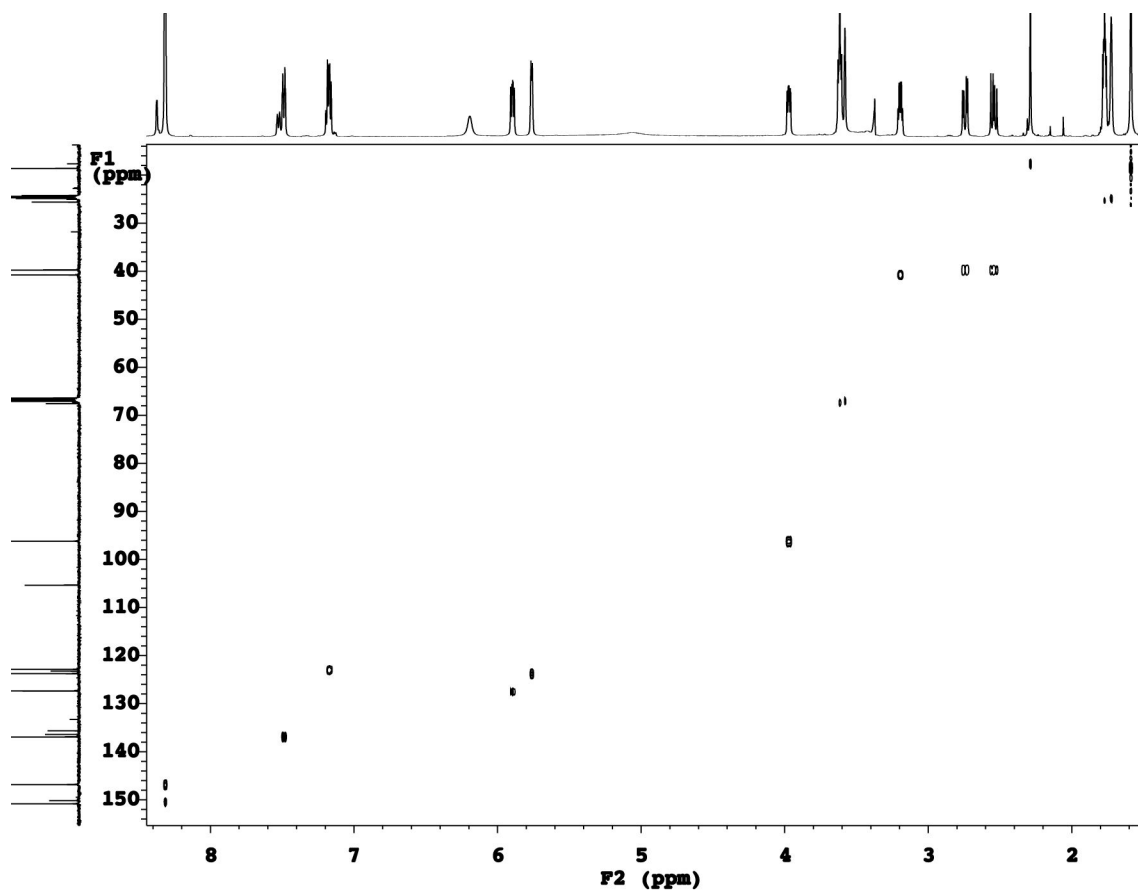

XXVI.  $[\text{H}, \text{C}]$ HSQC NMR spectrum of **23** recorded in neat  $\text{THF-}d_8$  at  $20\text{ }^\circ\text{C}$

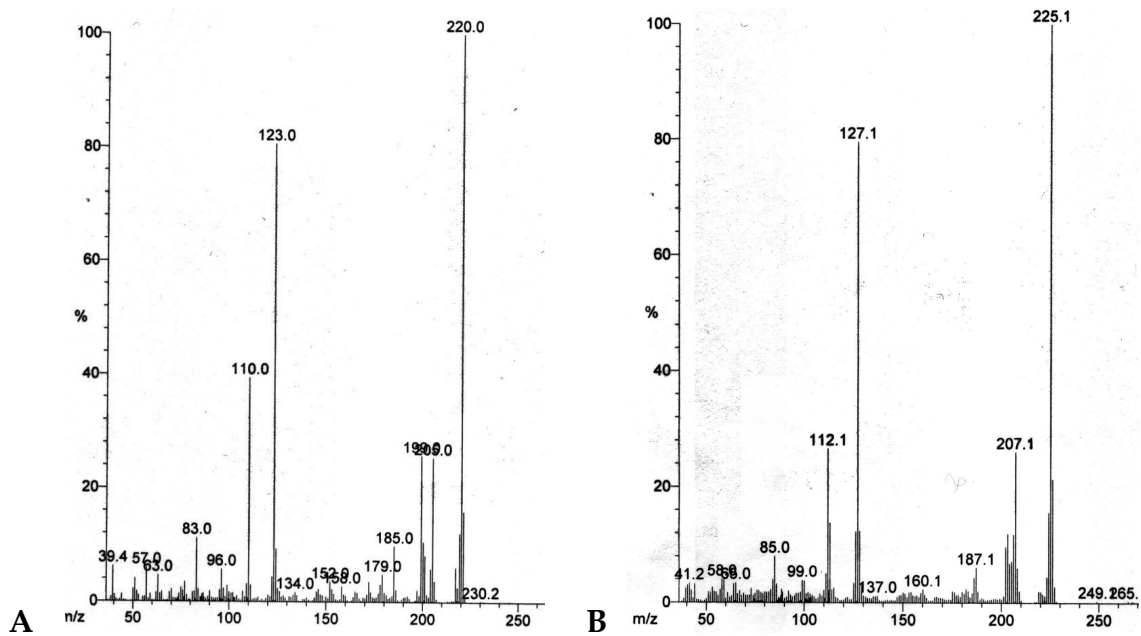

XXVII. Mass spectra of (A) **9**; and (B) **9-d<sub>5</sub>**.

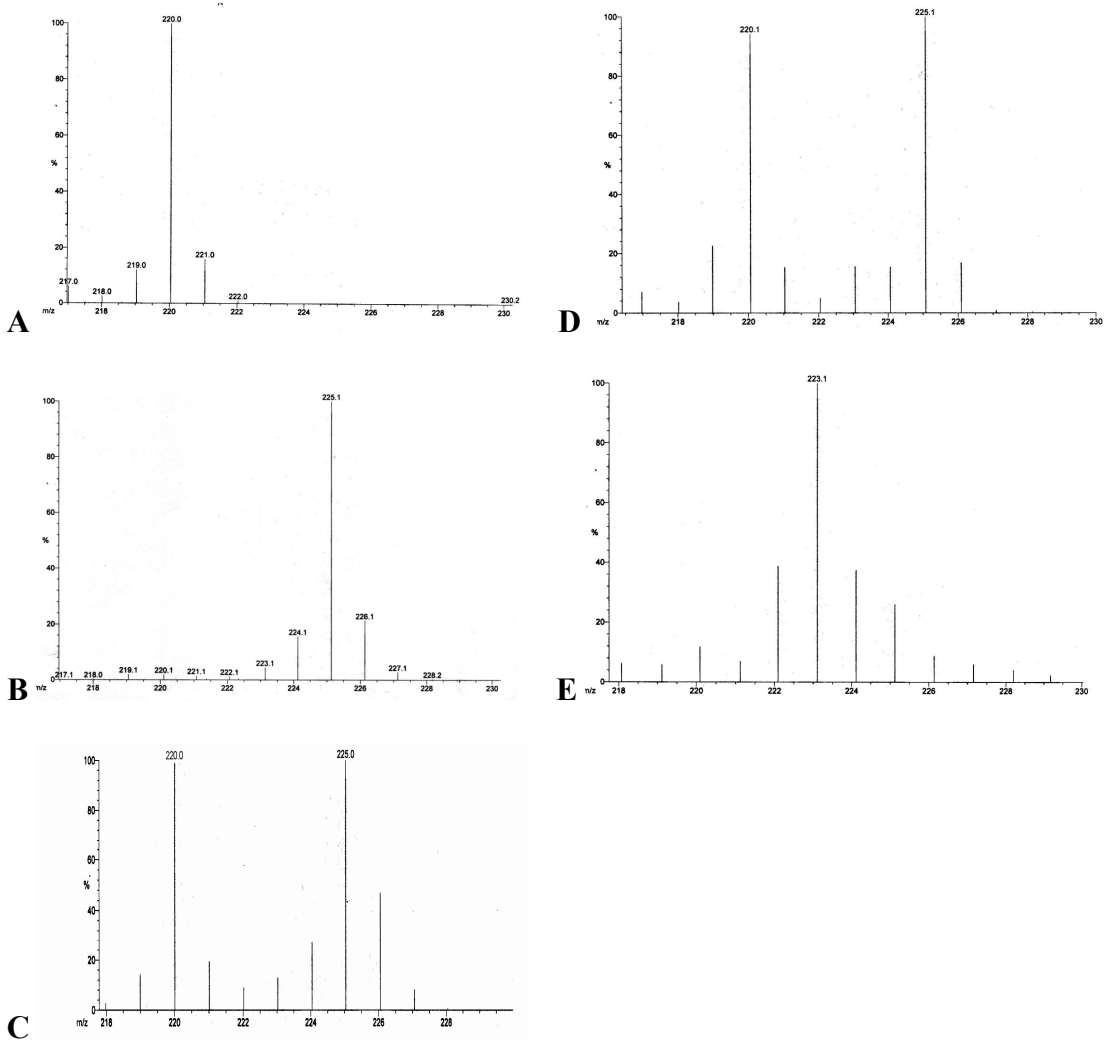

**XXVIII.** Expansion of  $M^+$  peak region of mass spectra. (A)  $9-d_0$ ; (B)  $9-d_5$ ; (C)  $9-d_0$  and  $9-d_5$  resulting from quench of independently prepared solutions of  $5-d_0$  and  $5-d_5$  mixed together and aged at  $-78\text{ }^\circ\text{C}$  for 7 min; (D)  $9-d_0$  and  $9-d_5$  resulting from quench of independently prepared solutions of  $5-d_0$  and  $5-d_5$  mixed together and aged at  $-78\text{ }^\circ\text{C}$  for 1.5 min; and (E)  $9-d_0$  and  $9-d_5$  resulting from quench of independently prepared solutions of  $5-d_0$  and  $5-d_5$  mixed together and aged at  $-40\text{ }^\circ\text{C}$  for 60 min.



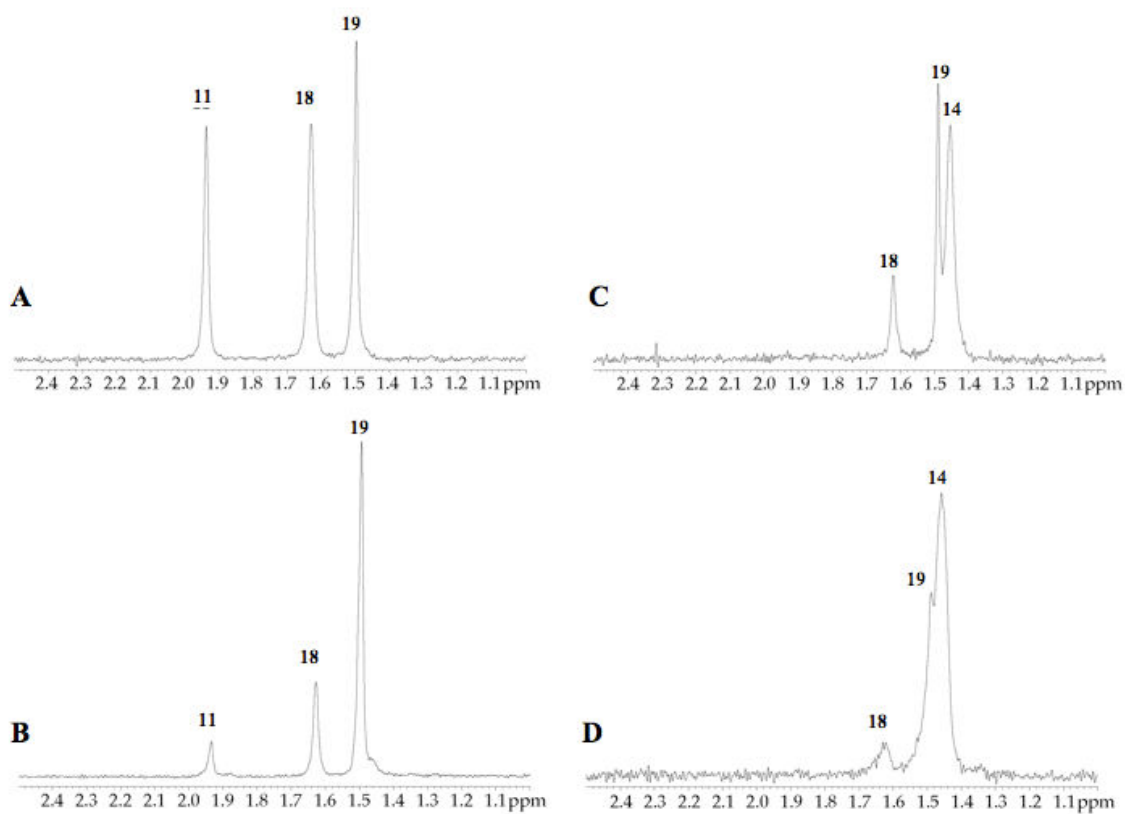

**XXIX.**  $^6\text{Li}$  NMR spectra of 0.20 M **6** in neat THF. (A) Recorded at  $-90\text{ }^\circ\text{C}$  after addition of 0.20 M PhCN to 0.20 M  $^6\text{Li}$  LDA and 2 hours aging at  $-90\text{ }^\circ\text{C}$ ; (B) recorded at  $-90\text{ }^\circ\text{C}$  after 1 hr aging at  $-60\text{ }^\circ\text{C}$ ; (C) recorded at  $-90\text{ }^\circ\text{C}$  after 4 min aging at  $-40\text{ }^\circ\text{C}$ ; and (D) recorded at  $-90\text{ }^\circ\text{C}$  after 4 hours aging at  $-40\text{ }^\circ\text{C}$ .

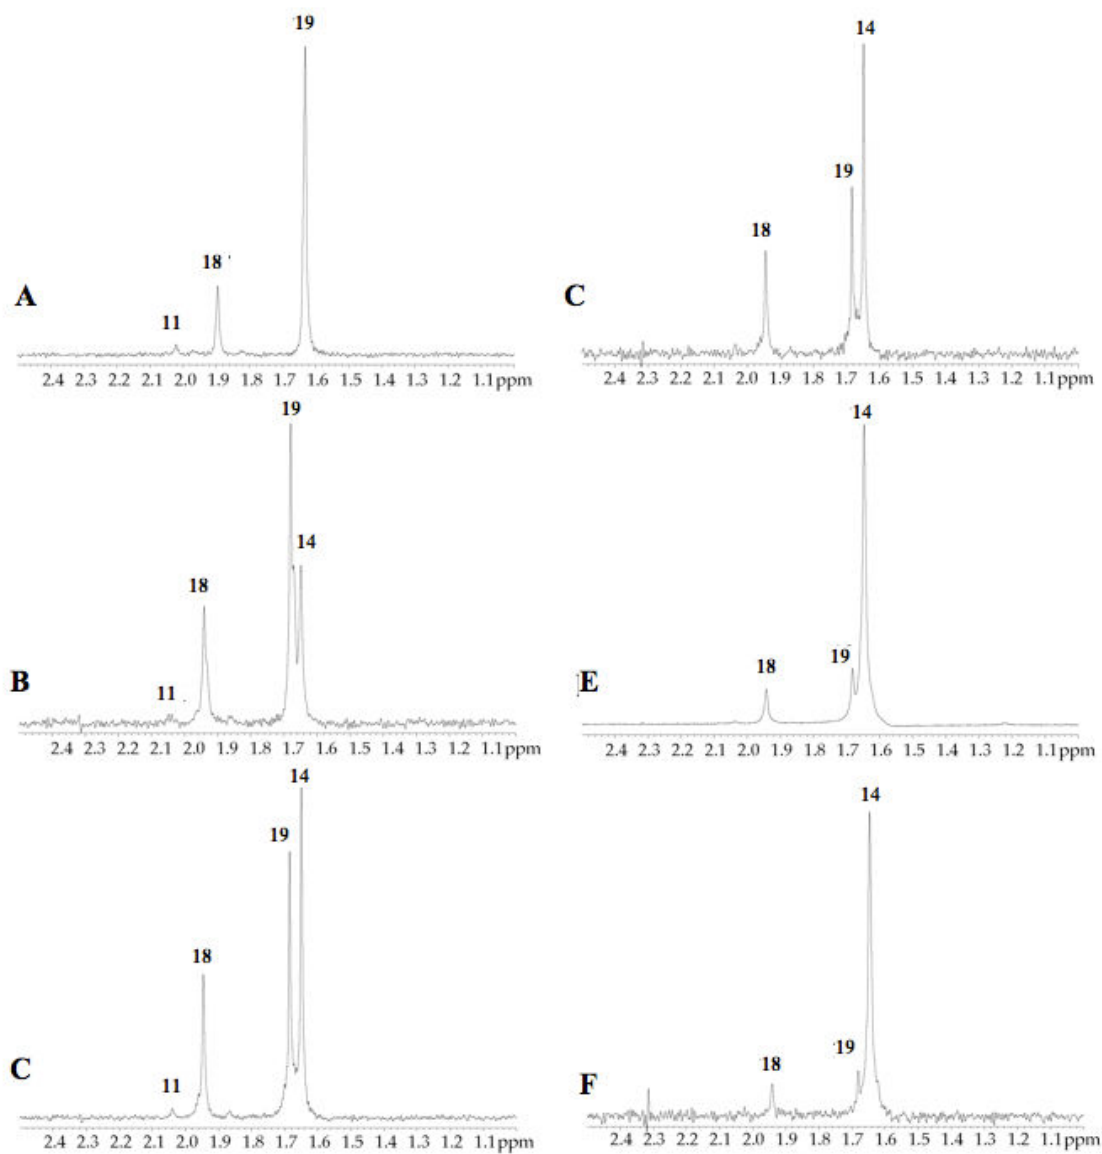

**XXX.**  $^6\text{Li}$  NMR spectra of 0.20 M **6** in neat THF. (A) Recorded at  $-50\text{ }^\circ\text{C}$ ; (B) recorded at  $-40\text{ }^\circ\text{C}$  after 4 min aging at  $-40\text{ }^\circ\text{C}$ ; (C) recorded at  $-40\text{ }^\circ\text{C}$  after 8 min aging at  $-40\text{ }^\circ\text{C}$ ; (D) recorded at  $-40\text{ }^\circ\text{C}$  after 12 min aging at  $-40\text{ }^\circ\text{C}$ ; (E) recorded at  $-40\text{ }^\circ\text{C}$  after 25 min aging at  $-40\text{ }^\circ\text{C}$ ; and (F) recorded at  $-40\text{ }^\circ\text{C}$  after 30 min aging at  $-40\text{ }^\circ\text{C}$ .

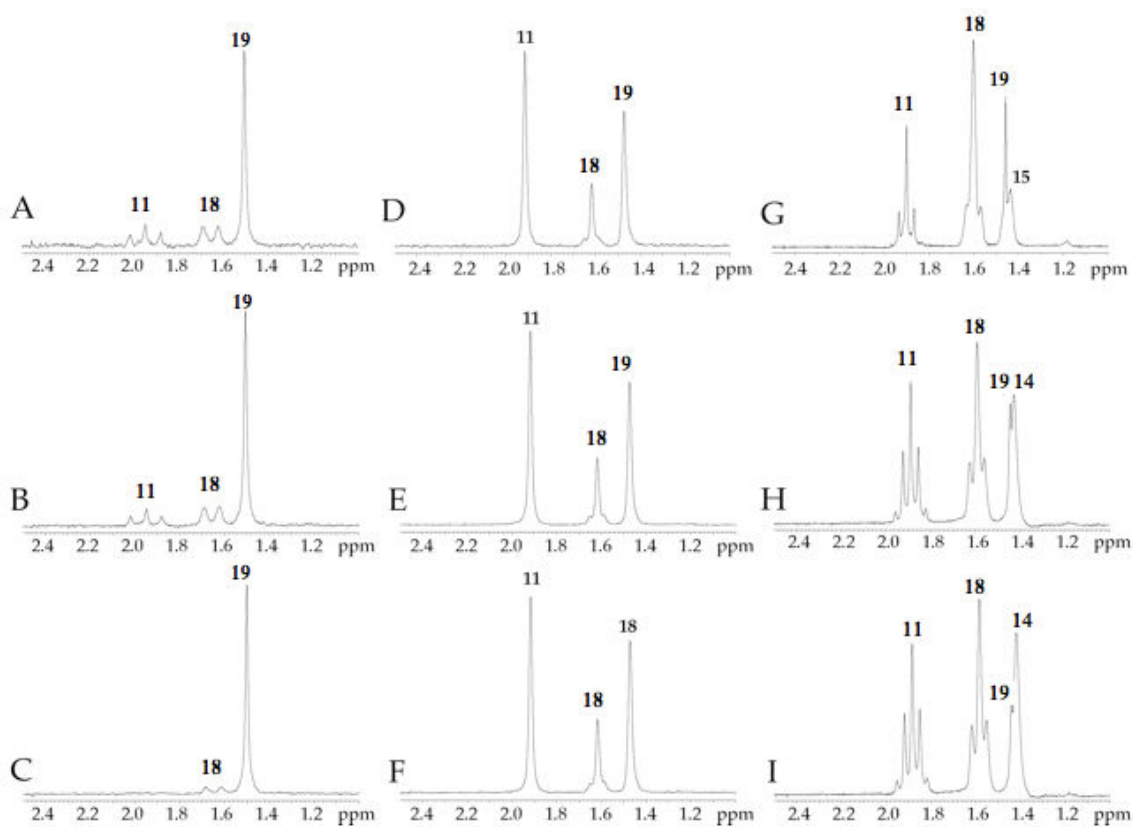

**XXXI.**  $^6\text{Li}$  NMR spectra of 0.20 M [ $^6\text{Li}$ ,  $^{15}\text{N}$ ]LDA plus 0.26 M PhCN in neat THF at  $-90$   $^\circ\text{C}$ . After (A) 5 min at  $-78$   $^\circ\text{C}$  and 9 min at  $-90$   $^\circ\text{C}$ ; (B) 3 additional min at  $-90$   $^\circ\text{C}$ ; (C) 27 additional min at  $-90$   $^\circ\text{C}$ ; (D) 4 min after addition of 0.20 M [ $^6\text{Li}$ ]LDA; (E) 13 min after addition; (F) 18 min after addition; (G) warming to  $-40$   $^\circ\text{C}$  for 9 min; (H) warming to  $-40$   $^\circ\text{C}$  for 49 min; and (I) warming to  $-40$   $^\circ\text{C}$  for 110 min.

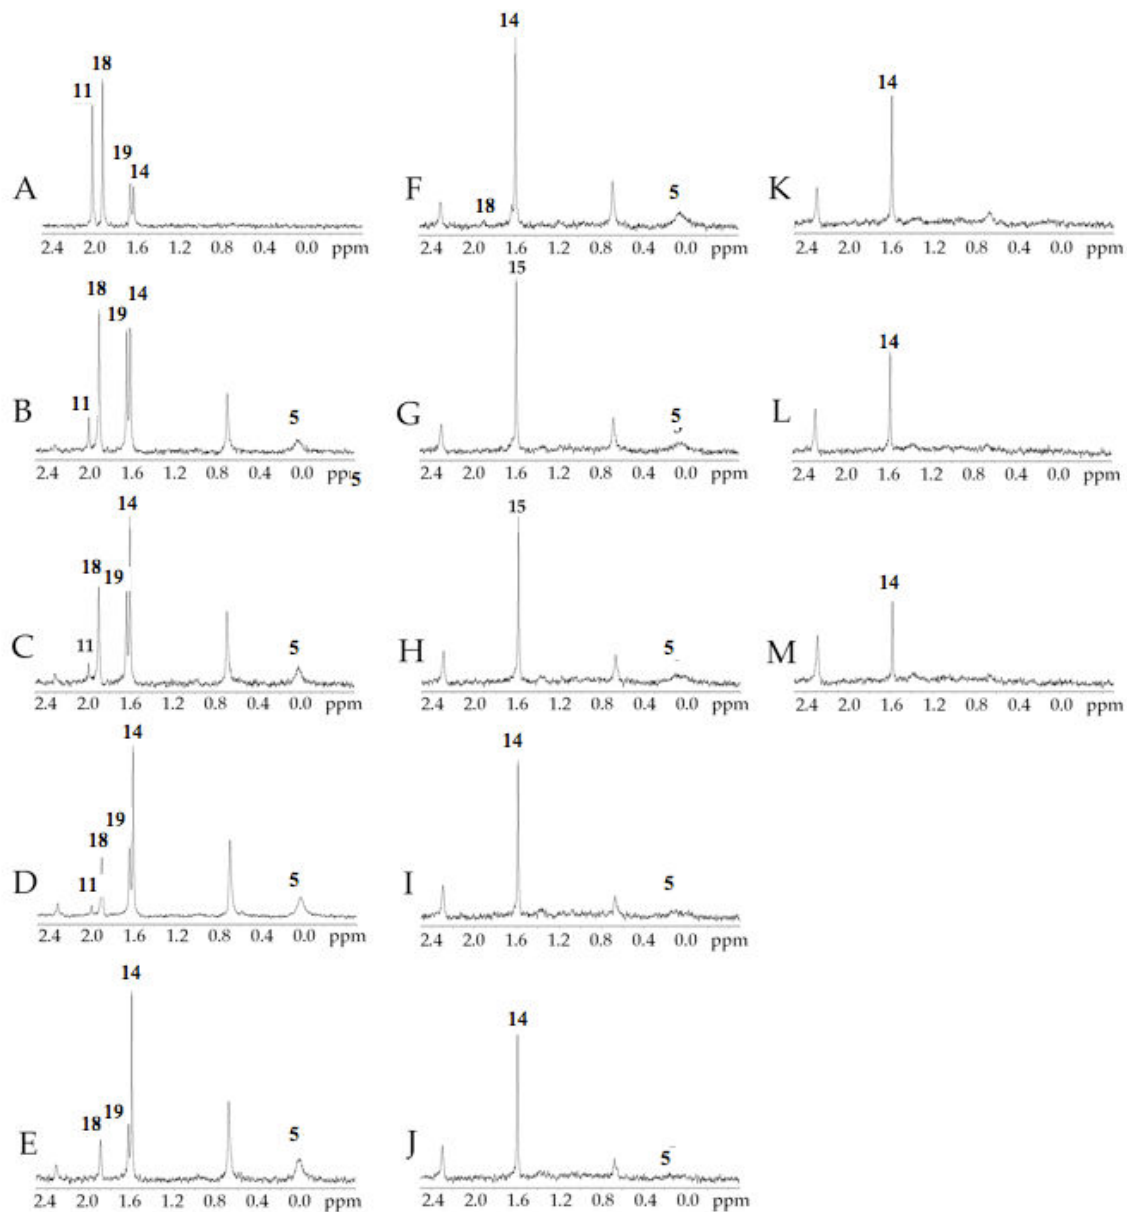

**XXXII.**  ${}^6\text{Li}$  spectra of 0.10 M **6** and 0.10 M [ ${}^6\text{Li}$ ]LDA in neat THF recorded at  $-40\text{ }^\circ\text{C}$  showing reaction with 1.0 eq **1**. (A) Before addition of **1**; after (B) 8 min reaction; (C) 16 min reaction; (D) 35 min reaction; (E) 45 min reaction; (F) after 73 min reaction; (G) 101 min reaction; (H) 129 min reaction; (I) 157 min reaction; (J) 185 min reaction; (K) 241 min reaction; (L) 353 min reaction; and (M) 465 min reaction.

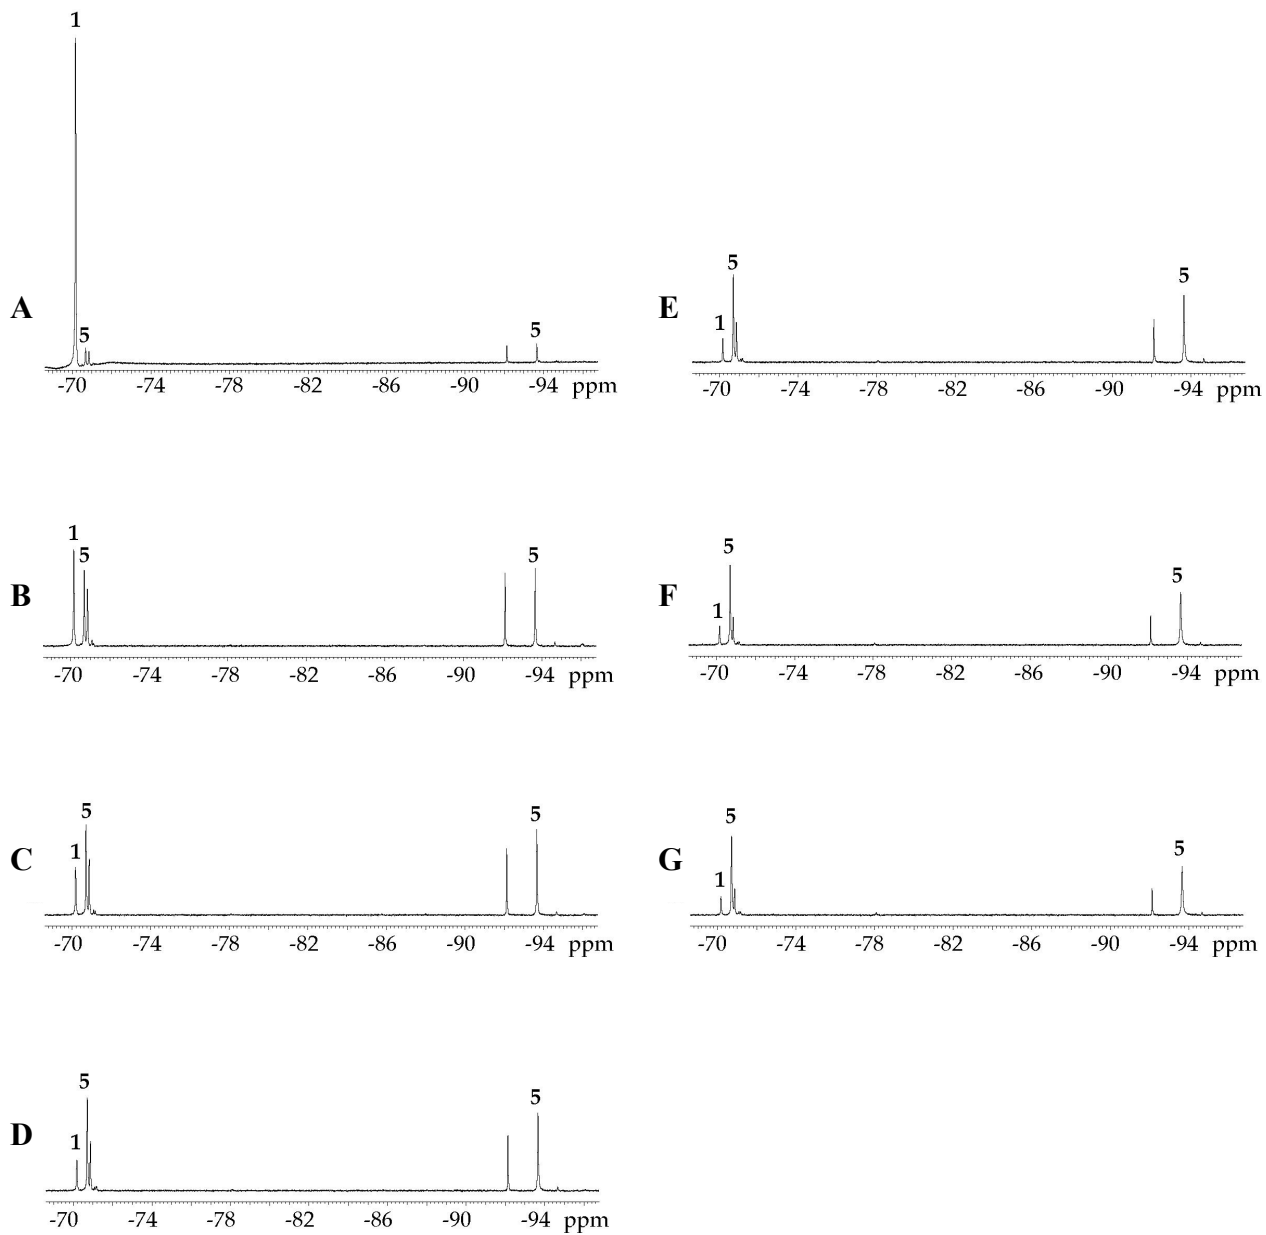

**XXXIII.**  $^{19}\text{F}$  NMR spectra of 0.10 M **6** with 0.10 M LDA in neat THF at  $-40\text{ }^{\circ}\text{C}$  showing reaction with 1.0 equiv of **1**. After (A) 20 seconds reaction; (B) 16 min reaction; (C) 32 min reaction; (D) 49.1 min reaction; (E) 65 min reaction; (F) 98 min reaction; and (G) 108 min reaction.

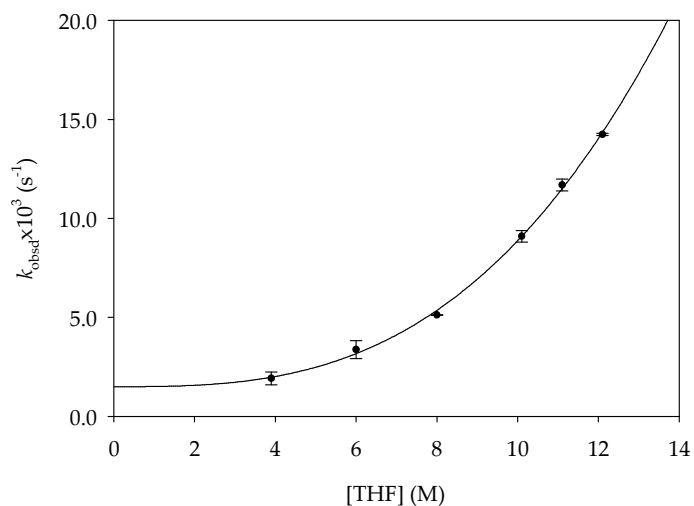

**XXXIV.** Plot of  $k_{\text{obsd}}$  vs [THF] in pentane for the deprotonation of 2-fluoro-3-methylpyridine (**1**, 0.01 M) by LDA (0.20 M) as determined by following loss of **1** at -20 °C by  $^{19}\text{F}$  NMR. The curve depicts an unweighted least-squares fit to  $k_{\text{obsd}} = a + k[\text{THF}]^n$  ( $a = 1.50 \pm 0.28$ ,  $k = (9.08 \pm 4.36) \times 10^{-3}$ ,  $n = 2.91 \pm 0.19$ ).

| [THF] (M) | $k_{\text{obsd}1}$ ( $\text{s}^{-1}$ ) | $k_{\text{obsd}2}$ ( $\text{s}^{-1}$ ) | $k_{\text{obsd}avg}$ ( $\text{s}^{-1}$ ) |
|-----------|----------------------------------------|----------------------------------------|------------------------------------------|
| 3.9       | $0.00169 \pm 3\text{E-}5$              | $0.00215 \pm 2\text{E-}5$              | $0.00192 \pm 3\text{E-}4$                |
| 6.0       | $0.00304 \pm 5\text{E-}5$              | $0.00369 \pm 3\text{E-}5$              | $0.00337 \pm 5\text{E-}4$                |
| 8.0       | $0.00511 \pm 9\text{E-}5$              | $0.00513 \pm 6\text{E-}5$              | $0.00512 \pm 2\text{E-}5$                |
| 10.1      | $0.00889 \pm 2\text{E-}4$              | $0.00930 \pm 4\text{E-}5$              | $0.00909 \pm 3\text{E-}4$                |
| 11.1      | $0.0115 \pm 4\text{E-}4$               | $0.0119 \pm 2\text{E-}4$               | $0.0117 \pm 3\text{E-}4$                 |
| 12.1      | $0.0142 \pm 1\text{E-}3$               | $0.0143 \pm 1\text{E-}3$               | $0.0142 \pm 6\text{E-}5$                 |

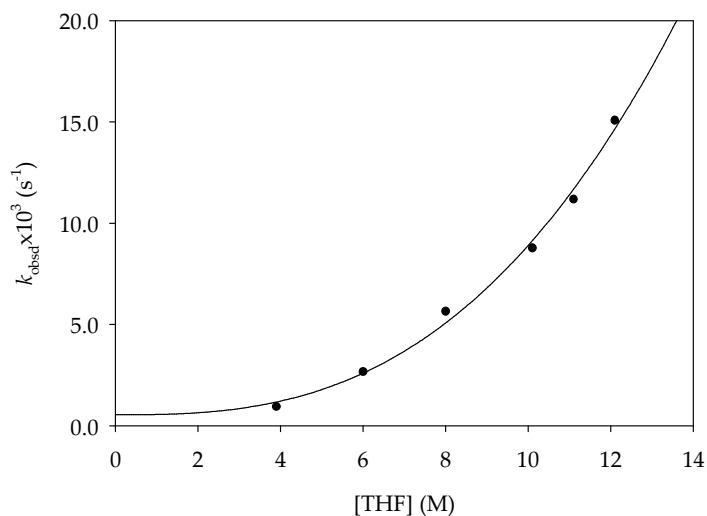

**XXXV.** Plot of  $k_{\text{obsd}}$  vs [THF] in 2,2,5,5-tetramethyltetrahydrofuran for the deprotonation of 2-fluoro-3-methylpyridine (**1**, 0.01 M) by LDA (0.20 M) as determined by following loss of **1** at  $-20\text{ }^{\circ}\text{C}$ . The curve depicts an unweighted least-squares fit to  $k_{\text{obsd}} = a + k[\text{THF}]^n$  ( $a = 0.541 \pm 0.757$ ,  $k = 0.0150 \pm 0.0163$ ,  $n = 2.75 \pm 0.43$ ).

| [THF] (M) | $k_{\text{obsd}}$ ( $\text{s}^{-1}$ ) |
|-----------|---------------------------------------|
| 3.9       | $0.000948 \pm 5\text{E-}6$            |
| 6.0       | $0.00267 \pm 4\text{E-}5$             |
| 8.0       | $0.00565 \pm 7\text{E-}5$             |
| 10.1      | $0.00877 \pm 1\text{E-}4$             |
| 11.1      | $0.0112 \pm 2\text{E-}4$              |
| 12.1      | $0.0151 \pm 5\text{E-}4$              |

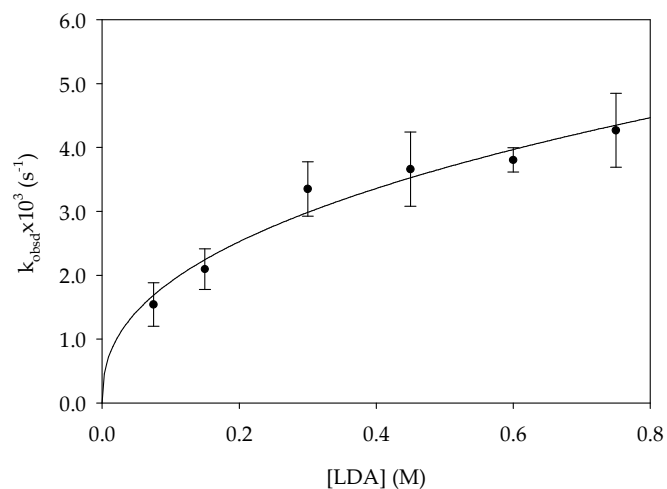

**XXXVI.** Plot of  $k_{\text{obsd}}$  vs [LDA] in 4.1 M THF/pentane for the deprotonation of 2-fluoro-3-methylpyridine (**1**, 0.01 M) by LDA as determined by following loss of **1** at  $-20\text{ }^{\circ}\text{C}$  by  $^{19}\text{F}$  NMR. The curve depicts an unweighted least-squares fit to  $k_{\text{obsd}} = k[\text{LDA}]^n$  ( $k = 4.90 \pm 0.24$ ,  $n = 0.41 \pm 0.05$ ).

| [LDA] (M) | $k_{\text{obsd}1}$ ( $\text{s}^{-1}$ ) | $k_{\text{obsd}2}$ ( $\text{s}^{-1}$ ) | $k_{\text{obsd}avg}$ ( $\text{s}^{-1}$ ) |
|-----------|----------------------------------------|----------------------------------------|------------------------------------------|
| 0.075     | $0.00130 \pm 1\text{E-}5$              | $0.00178 \pm 2\text{E-}5$              | $0.00154 \pm 3\text{E-}4$                |
| 0.15      | $0.00187 \pm 2\text{E-}5$              | $0.00232 \pm 3\text{E-}5$              | $0.00210 \pm 3\text{E-}4$                |
| 0.30      | $0.00305 \pm 3\text{E-}5$              | $0.00365 \pm 3\text{E-}5$              | $0.00335 \pm 4\text{E-}4$                |
| 0.45      | $0.00325 \pm 3\text{E-}5$              | $0.00407 \pm 4\text{E-}5$              | $0.00366 \pm 6\text{E-}4$                |
| 0.60      | $0.00394 \pm 5\text{E-}5$              | $0.00367 \pm 6\text{E-}5$              | $0.00381 \pm 2\text{E-}4$                |
| 0.75      | $0.00468 \pm 6\text{E-}5$              | $0.00386 \pm 6\text{E-}5$              | $0.00427 \pm 6\text{E-}4$                |



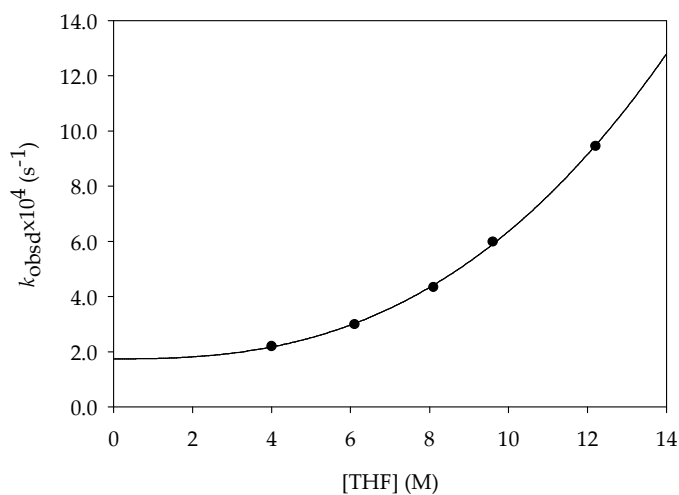

**XXXVII.** Plot of  $k_{\text{obsd}}$  vs [THF] in pentane for the deprotonation of 2-fluoro-3-methylpyridine (**1**, 0.01 M) by LDA (0.20 M) as determined by following formation of **5** at -40 °C via in situ IR. The curve depicts an unweighted least-squares fit to  $k_{\text{obsd}} = a + k[\text{THF}]^n$  ( $a = 1.75 \pm 0.13$ ,  $k = (0.012 \pm 0.003)$ ,  $n = 2.59 \pm 0.11$ ).

| [THF] (M) | $k_{\text{obsd}}$ (s <sup>-1</sup> ) |
|-----------|--------------------------------------|
| 4.0       | $0.000220 \pm 6\text{E-}6$           |
| 6.1       | $0.000300 \pm 1\text{E-}6$           |
| 8.1       | $0.000435 \pm 9\text{E-}6$           |
| 9.6       | $0.000599 \pm 4\text{E-}5$           |
| 12.2      | $0.000946 \pm 5\text{E-}5$           |

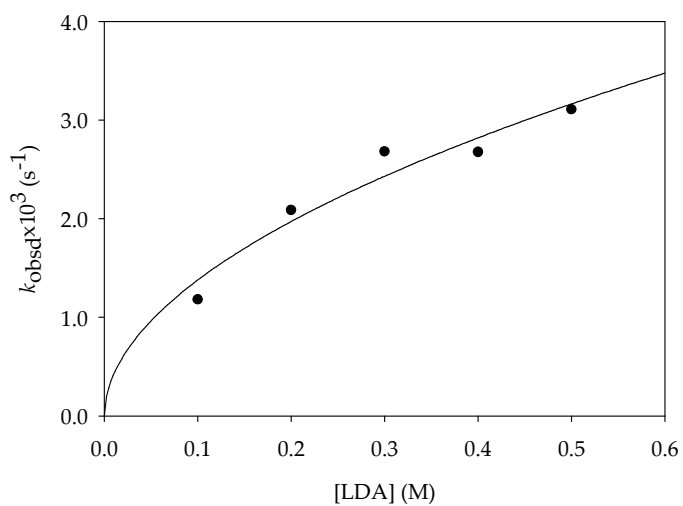

**XXXVIII.** Plot of  $k_{\text{obsd}}$  vs [LDA] in 12.3 M THF for the deprotonation of 2-fluoro-3-methylpyridine (**1**, 0.01 M) by LDA as determined by following product formation at -40 °C via in situ IR. The curve depicts an unweighted least-squares fit to  $k_{\text{obsd}} = k[\text{LDA}]^n$  ( $k = (4.53 \pm 0.47) \times 10^{-3}$ ,  $n = 0.52 \pm 0.09$ ).

| [LDA] (M) | $k_{\text{obsd}}$ ( $\text{s}^{-1}$ ) |
|-----------|---------------------------------------|
| 0.10      | $0.00118 \pm 7\text{E-}5$             |
| 0.20      | $0.00209 \pm 2\text{E-}4$             |
| 0.30      | $0.00268 \pm 2\text{E-}4$             |
| 0.40      | $0.00268 \pm 2\text{E-}4$             |
| 0.50      | $0.00311 \pm 3\text{E-}4$             |

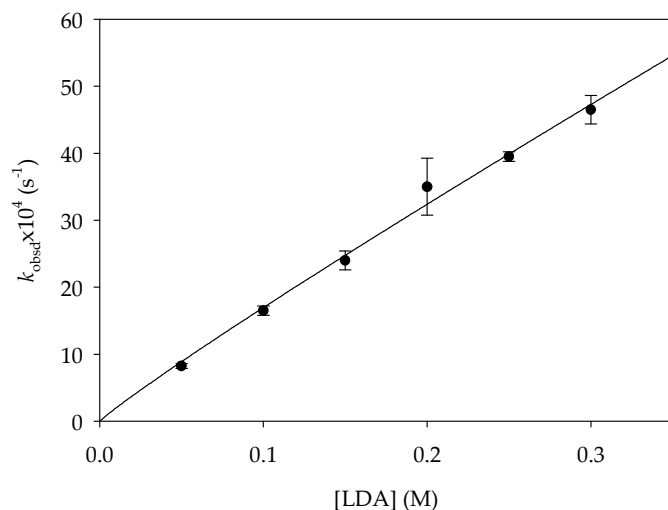

**XXXIX.** Plot of  $k_{\text{obsd}}$  vs [LDA] in 10.0 M THF/pentane for the condensation of PhCN (0.01 M) by LDA as determined by following loss of starting material at -78 °C via in situ IR. The curve depicts an unweighted least-squares fit to  $k_{\text{obsd}} = k[\text{LDA}]^n$  ( $k = 1.45 \pm 0.24$ ,  $n = 0.93 \pm 0.05$ ).

| [LDA] (M) | $k_{\text{obsd}1}$ (s <sup>-1</sup> ) | $k_{\text{obsd}2}$ (s <sup>-1</sup> ) | $k_{\text{obsd}avg}$ (s <sup>-1</sup> ) |
|-----------|---------------------------------------|---------------------------------------|-----------------------------------------|
| 0.05      | $0.00085 \pm 2\text{E-}5$             | $0.00080 \pm 1\text{E-}5$             | $0.00083 \pm 9\text{E-}5$               |
| 0.10      | $0.0017 \pm 1\text{E-}4$              | $0.0016 \pm 1\text{E-}4$              | $0.00165 \pm 1\text{E-}4$               |
| 0.15      | $0.0023 \pm 1\text{E-}4$              | $0.0025 \pm 2\text{E-}4$              | $0.0024 \pm 1\text{E-}4$                |
| 0.20      | $0.0038 \pm 2\text{E-}4$              | $0.0032 \pm 3\text{E-}4$              | $0.0035 \pm 2\text{E-}4$                |
| 0.25      | $0.0039 \pm 1\text{E-}4$              | $0.0040 \pm 1\text{E-}4$              | $0.00395 \pm 7\text{E-}5$               |
| 0.30      | $0.0045 \pm 2\text{E-}4$              | $0.0048 \pm 2\text{E-}4$              | $0.00465 \pm 8\text{E-}5$               |

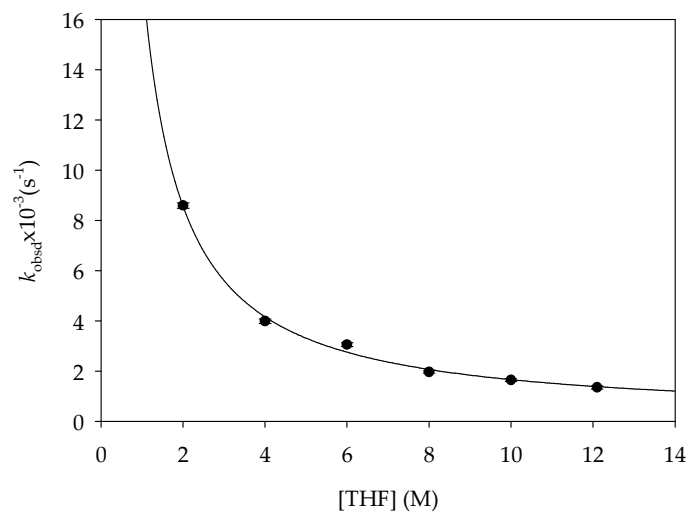

L. Plot of  $k_{\text{obsd}}$  vs [THF] in pentane for the the condensation of PhCN ( 0.01 M) by LDA (0.20 M) as determined by following product formation at -78 °C via in situ IR. The curve depicts an unweighted least-squares fit to  $k_{\text{obsd}} = a + k[\text{THF}]^n$  ( $a = 1.76 \pm 0.5$ ,  $k = 0.16 \pm 0.26$ ,  $n = -1.07 \pm 0.07$ ).

| [THF] (M) | $k_{\text{obsd}1}$ ( $\text{s}^{-1}$ ) | $k_{\text{obsd}2}$ ( $\text{s}^{-1}$ ) | $k_{\text{obsd}avg}$ ( $\text{s}^{-1}$ ) |
|-----------|----------------------------------------|----------------------------------------|------------------------------------------|
| 2.0       | $0.0085 \pm 3\text{E-}4$               | $0.0087 \pm 2\text{E-}4$               | $0.0086 \pm 2\text{E-}4$                 |
| 4.0       | $0.0041 \pm 4\text{E-}4$               | $0.0039 \pm 3\text{E-}4$               | $0.0040 \pm 1\text{E-}4$                 |
| 6.0       | $0.0031 \pm 2\text{E-}4$               | $0.0030 \pm 1\text{E-}4$               | $0.0031 \pm 1\text{E-}4$                 |
| 8.0       | $0.0019 \pm 1\text{E-}4$               | $0.0020 \pm 2\text{E-}4$               | $0.00195 \pm 1\text{E-}4$                |
| 10.0      | $0.0017 \pm 1\text{E-}4$               | $0.0016 \pm 4\text{E-}4$               | $0.00165 \pm 7\text{E-}5$                |
| 12.1      | $0.0013 \pm 3\text{E-}4$               | $0.0014 \pm 3\text{E-}4$               | $0.00135 \pm 9\text{E-}5$                |

**XLI.** X-Ray structure of **9**.

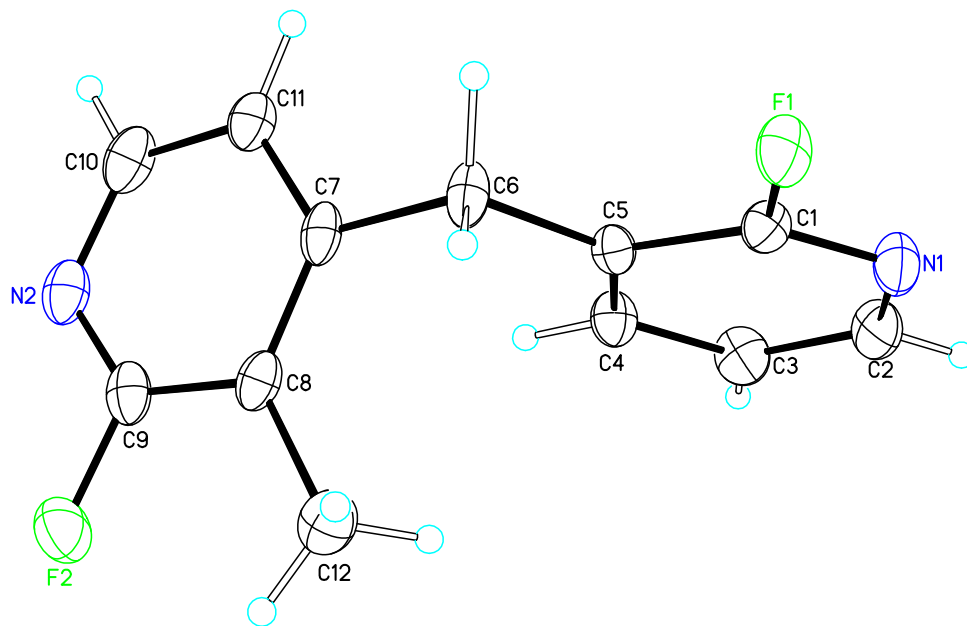

Table 1. Crystal data and structure refinement.

|                                   |                                                               |                 |
|-----------------------------------|---------------------------------------------------------------|-----------------|
| Identification code               | <b>9</b>                                                      |                 |
| Empirical formula                 | C <sub>12</sub> H <sub>10</sub> F <sub>2</sub> N <sub>2</sub> |                 |
| Formula weight                    | 220.22                                                        |                 |
| Temperature                       | 173(2) K                                                      |                 |
| Wavelength                        | 0.71073 Å                                                     |                 |
| Crystal system                    | Triclinic                                                     |                 |
| Space group                       | P-1                                                           |                 |
| Unit cell dimensions              | a = 7.3370(8) Å                                               | α = 92.050(4)°. |
|                                   | b = 10.6664(11) Å                                             | β = 95.711(4)°. |
|                                   | c = 13.1655(14) Å                                             | γ = 94.074(4)°. |
| Volume                            | 1021.67(19) Å <sup>3</sup>                                    |                 |
| Z                                 | 4                                                             |                 |
| Density (calculated)              | 1.432 Mg/m <sup>3</sup>                                       |                 |
| Absorption coefficient            | 0.112 mm <sup>-1</sup>                                        |                 |
| F(000)                            | 456                                                           |                 |
| Crystal size                      | 0.50 x 0.45 x 0.40 mm <sup>3</sup>                            |                 |
| Theta range for data collection   | 1.56 to 28.49°.                                               |                 |
| Index ranges                      | -9 ≤ h ≤ 9, -14 ≤ k ≤ 13, -17 ≤ l ≤ 17                        |                 |
| Reflections collected             | 21945                                                         |                 |
| Independent reflections           | 5007 [R(int) = 0.0339]                                        |                 |
| Completeness to theta = 28.49°    | 96.7 %                                                        |                 |
| Absorption correction             | Semi-empirical from equivalents                               |                 |
| Max. and min. transmission        | 0.9565 and 0.9461                                             |                 |
| Refinement method                 | Full-matrix least-squares on F <sup>2</sup>                   |                 |
| Data / restraints / parameters    | 5007 / 0 / 291                                                |                 |
| Goodness-of-fit on F <sup>2</sup> | 1.513                                                         |                 |
| Final R indices [I > 2σ(I)]       | R1 = 0.0767, wR2 = 0.2157                                     |                 |
| R indices (all data)              | R1 = 0.1012, wR2 = 0.2301                                     |                 |
| Largest diff. peak and hole       | 0.743 and -0.316 e.Å <sup>-3</sup>                            |                 |

Table 2. Atomic coordinates ( $\times 10^4$ ) and equivalent isotropic displacement parameters ( $\text{\AA}^2 \times 10^3$ )  $U(\text{eq})$  is defined as one third of the trace of the orthogonalized  $U^{ij}$  tensor.

|       | x        | y        | z       | $U(\text{eq})$ |
|-------|----------|----------|---------|----------------|
| F(1)  | 1209(1)  | 1264(1)  | 8718(1) | 33(1)          |
| F(2)  | 4831(2)  | 6726(1)  | 6081(1) | 42(1)          |
| F(3)  | 1972(1)  | 1148(1)  | 6266(1) | 38(1)          |
| F(4)  | -1560(2) | -4333(1) | 9015(1) | 47(1)          |
| N(1)  | 3972(2)  | 505(1)   | 8843(1) | 32(1)          |
| N(2)  | 4775(2)  | 7376(1)  | 7706(1) | 33(1)          |
| N(3)  | -842(2)  | 1829(1)  | 5982(1) | 34(1)          |
| N(4)  | -1502(2) | -4951(1) | 7390(1) | 32(1)          |
| C(1)  | 3050(2)  | 1482(2)  | 8695(1) | 24(1)          |
| C(2)  | 5790(3)  | 694(2)   | 8810(1) | 36(1)          |
| C(3)  | 6639(2)  | 1850(2)  | 8624(1) | 34(1)          |
| C(4)  | 5564(2)  | 2858(2)  | 8467(1) | 28(1)          |
| C(5)  | 3691(2)  | 2710(1)  | 8506(1) | 22(1)          |
| C(6)  | 2371(2)  | 3720(1)  | 8362(1) | 28(1)          |
| C(7)  | 3247(2)  | 4981(1)  | 8124(1) | 26(1)          |
| C(8)  | 3699(2)  | 5217(2)  | 7153(1) | 26(1)          |
| C(9)  | 4428(2)  | 6445(2)  | 7027(1) | 29(1)          |
| C(10) | 4350(2)  | 7095(2)  | 8645(2) | 35(1)          |
| C(11) | 3595(2)  | 5943(2)  | 8894(1) | 30(1)          |
| C(12) | 3432(3)  | 4257(2)  | 6284(1) | 36(1)          |
| C(13) | 137(2)   | 895(2)   | 6236(1) | 25(1)          |
| C(14) | -2666(3) | 1594(2)  | 5952(1) | 38(1)          |
| C(15) | -3479(2) | 451(2)   | 6172(1) | 35(1)          |
| C(16) | -2361(2) | -512(2)  | 6439(1) | 29(1)          |
| C(17) | -490(2)  | -306(1)  | 6479(1) | 21(1)          |
| C(18) | 872(2)   | -1271(1) | 6756(1) | 26(1)          |
| C(19) | -2(2)    | -2542(2) | 6992(1) | 25(1)          |
| C(20) | -438(2)  | -2793(2) | 7963(1) | 27(1)          |
| C(21) | -1159(2) | -4031(2) | 8074(1) | 29(1)          |
| C(22) | -1087(2) | -4654(2) | 6451(1) | 33(1)          |
| C(23) | -342(2)  | -3496(2) | 6212(1) | 27(1)          |
| C(24) | -192(3)  | -1867(2) | 8844(2) | 42(1)          |

Table 3. Bond lengths [Å] and angles [°].

---

|                  |            |
|------------------|------------|
| F(1)-C(1)        | 1.3577(18) |
| F(2)-C(9)        | 1.347(2)   |
| F(3)-C(13)       | 1.3504(18) |
| F(4)-C(21)       | 1.347(2)   |
| N(1)-C(1)        | 1.292(2)   |
| N(1)-C(2)        | 1.340(2)   |
| N(2)-C(9)        | 1.306(2)   |
| N(2)-C(10)       | 1.344(2)   |
| N(3)-C(13)       | 1.304(2)   |
| N(3)-C(14)       | 1.340(2)   |
| N(4)-C(21)       | 1.301(2)   |
| N(4)-C(22)       | 1.345(2)   |
| C(1)-C(5)        | 1.400(2)   |
| C(2)-C(3)        | 1.383(3)   |
| C(3)-C(4)        | 1.388(2)   |
| C(4)-C(5)        | 1.378(2)   |
| C(5)-C(6)        | 1.503(2)   |
| C(6)-C(7)        | 1.506(2)   |
| C(7)-C(8)        | 1.380(2)   |
| C(7)-C(11)       | 1.407(2)   |
| C(8)-C(9)        | 1.402(2)   |
| C(8)-C(12)       | 1.495(2)   |
| C(10)-C(11)      | 1.376(2)   |
| C(13)-C(17)      | 1.389(2)   |
| C(14)-C(15)      | 1.372(3)   |
| C(15)-C(16)      | 1.393(2)   |
| C(16)-C(17)      | 1.370(2)   |
| C(17)-C(18)      | 1.514(2)   |
| C(18)-C(19)      | 1.514(2)   |
| C(19)-C(20)      | 1.379(2)   |
| C(19)-C(23)      | 1.411(2)   |
| C(20)-C(21)      | 1.406(2)   |
| C(20)-C(24)      | 1.485(3)   |
| C(22)-C(23)      | 1.375(2)   |
| C(1)-N(1)-C(2)   | 115.61(14) |
| C(9)-N(2)-C(10)  | 114.15(15) |
| C(13)-N(3)-C(14) | 115.70(15) |
| C(21)-N(4)-C(22) | 114.15(15) |
| N(1)-C(1)-F(1)   | 114.56(13) |
| N(1)-C(1)-C(5)   | 128.80(15) |
| F(1)-C(1)-C(5)   | 116.64(13) |
| N(1)-C(2)-C(3)   | 122.73(16) |
| C(2)-C(3)-C(4)   | 118.65(16) |
| C(5)-C(4)-C(3)   | 120.53(15) |



|                   |            |
|-------------------|------------|
| C(4)-C(5)-C(1)    | 113.67(14) |
| C(4)-C(5)-C(6)    | 126.10(14) |
| C(1)-C(5)-C(6)    | 120.24(14) |
| C(5)-C(6)-C(7)    | 114.32(13) |
| C(8)-C(7)-C(11)   | 119.16(15) |
| C(8)-C(7)-C(6)    | 120.77(15) |
| C(11)-C(7)-C(6)   | 120.06(16) |
| C(7)-C(8)-C(9)    | 114.86(15) |
| C(7)-C(8)-C(12)   | 123.70(15) |
| C(9)-C(8)-C(12)   | 121.44(16) |
| N(2)-C(9)-F(2)    | 114.40(14) |
| N(2)-C(9)-C(8)    | 128.84(17) |
| F(2)-C(9)-C(8)    | 116.76(15) |
| N(2)-C(10)-C(11)  | 124.38(16) |
| C(10)-C(11)-C(7)  | 118.58(17) |
| N(3)-C(13)-F(3)   | 114.99(13) |
| N(3)-C(13)-C(17)  | 127.58(15) |
| F(3)-C(13)-C(17)  | 117.44(14) |
| N(3)-C(14)-C(15)  | 123.12(17) |
| C(14)-C(15)-C(16) | 118.58(17) |
| C(17)-C(16)-C(15) | 119.96(16) |
| C(16)-C(17)-C(13) | 115.06(14) |
| C(16)-C(17)-C(18) | 125.11(14) |
| C(13)-C(17)-C(18) | 119.82(14) |
| C(19)-C(18)-C(17) | 114.19(13) |
| C(20)-C(19)-C(23) | 119.36(15) |
| C(20)-C(19)-C(18) | 121.13(15) |
| C(23)-C(19)-C(18) | 119.49(15) |
| C(19)-C(20)-C(21) | 114.46(15) |
| C(19)-C(20)-C(24) | 124.74(16) |
| C(21)-C(20)-C(24) | 120.80(17) |
| N(4)-C(21)-F(4)   | 114.08(14) |
| N(4)-C(21)-C(20)  | 129.21(17) |
| F(4)-C(21)-C(20)  | 116.71(15) |
| N(4)-C(22)-C(23)  | 124.31(16) |
| C(22)-C(23)-C(19) | 118.48(16) |

---

Symmetry transformations used to generate equivalent atoms:

Table 4. Anisotropic displacement parameters ( $\text{\AA}^2 \times 10^3$ ). The anisotropic displacement factor exponent takes the form:  $-2\pi^2 [ h^2 a^{*2} U^{11} + \dots + 2 h k a^* b^* U^{12} ]$

|       | U11   | U22   | U33   | U23   | U13   | U12   |
|-------|-------|-------|-------|-------|-------|-------|
| F(1)  | 23(1) | 24(1) | 51(1) | 2(1)  | 6(1)  | -6(1) |
| F(2)  | 45(1) | 38(1) | 45(1) | 13(1) | 10(1) | 2(1)  |
| F(3)  | 26(1) | 27(1) | 60(1) | 10(1) | 7(1)  | -9(1) |
| F(4)  | 54(1) | 44(1) | 46(1) | 12(1) | 12(1) | -2(1) |
| N(1)  | 33(1) | 22(1) | 42(1) | 6(1)  | 6(1)  | 5(1)  |
| N(2)  | 22(1) | 26(1) | 50(1) | 5(1)  | 3(1)  | 4(1)  |
| N(3)  | 39(1) | 26(1) | 39(1) | 11(1) | 8(1)  | 7(1)  |
| N(4)  | 21(1) | 29(1) | 46(1) | 7(1)  | 2(1)  | 4(1)  |
| C(1)  | 21(1) | 22(1) | 28(1) | -1(1) | 3(1)  | 0(1)  |
| C(2)  | 36(1) | 33(1) | 44(1) | 10(1) | 9(1)  | 18(1) |
| C(3)  | 20(1) | 40(1) | 43(1) | 8(1)  | 4(1)  | 9(1)  |
| C(4)  | 23(1) | 24(1) | 35(1) | 4(1)  | 2(1)  | -1(1) |
| C(5)  | 21(1) | 20(1) | 23(1) | 2(1)  | 1(1)  | 0(1)  |
| C(6)  | 20(1) | 17(1) | 48(1) | 6(1)  | 5(1)  | 2(1)  |
| C(7)  | 17(1) | 19(1) | 43(1) | 5(1)  | 1(1)  | 5(1)  |
| C(8)  | 19(1) | 22(1) | 37(1) | 0(1)  | -1(1) | 6(1)  |
| C(9)  | 18(1) | 26(1) | 44(1) | 9(1)  | 3(1)  | 4(1)  |
| C(10) | 27(1) | 24(1) | 51(1) | -6(1) | -3(1) | 0(1)  |
| C(11) | 26(1) | 26(1) | 38(1) | 1(1)  | 2(1)  | 6(1)  |
| C(12) | 36(1) | 32(1) | 39(1) | -2(1) | 0(1)  | 4(1)  |
| C(13) | 26(1) | 22(1) | 27(1) | 1(1)  | 6(1)  | -2(1) |
| C(14) | 39(1) | 36(1) | 40(1) | 10(1) | 6(1)  | 15(1) |
| C(15) | 22(1) | 41(1) | 44(1) | 6(1)  | 4(1)  | 7(1)  |
| C(16) | 22(1) | 26(1) | 39(1) | 4(1)  | 3(1)  | 0(1)  |
| C(17) | 22(1) | 19(1) | 21(1) | -2(1) | 1(1)  | 0(1)  |
| C(18) | 19(1) | 21(1) | 39(1) | 5(1)  | 4(1)  | -1(1) |
| C(19) | 14(1) | 21(1) | 41(1) | 5(1)  | 1(1)  | 3(1)  |
| C(20) | 21(1) | 25(1) | 36(1) | 1(1)  | 1(1)  | 3(1)  |
| C(21) | 19(1) | 28(1) | 42(1) | 10(1) | 3(1)  | 1(1)  |
| C(22) | 27(1) | 25(1) | 44(1) | -4(1) | -3(1) | 0(1)  |
| C(23) | 21(1) | 23(1) | 37(1) | 2(1)  | 1(1)  | 0(1)  |
| C(24) | 42(1) | 39(1) | 44(1) | -5(1) | 7(1)  | 4(1)  |

Table 5. Hydrogen coordinates ( $\times 10^4$ ) and isotropic displacement parameters ( $\text{\AA}^2 \times 10^3$ )

|        | x        | y        | z       | U(eq) |
|--------|----------|----------|---------|-------|
| H(2)   | 6527     | 4        | 8919    | 44    |
| H(3)   | 7932     | 1953     | 8605    | 40    |
| H(4)   | 6123     | 3658     | 8332    | 33    |
| H(6A)  | 1753     | 3817     | 8992    | 34    |
| H(6B)  | 1416     | 3443     | 7798    | 34    |
| H(10)  | 4586     | 7735     | 9171    | 42    |
| H(11)  | 3314     | 5799     | 9571    | 36    |
| H(12A) | 4164(9)  | 3582(8)  | 6439(2) | 54    |
| H(12B) | 3780(5)  | 4630(4)  | 5685(7) | 54    |
| H(12C) | 2182(14) | 3954(4)  | 6180(2) | 54    |
| H(14)  | -3431    | 2249     | 5771    | 45    |
| H(15)  | -4778    | 319      | 6142    | 42    |
| H(16)  | -2895    | -1311    | 6593    | 35    |
| H(18A) | 1628     | -1384    | 6182    | 31    |
| H(18B) | 1705     | -941     | 7359    | 31    |
| H(22)  | -1325    | -5287    | 5918    | 39    |
| H(23)  | -62      | -3341    | 5536    | 33    |
| H(24A) | 987(15)  | -1713(3) | 9041(3) | 63    |
| H(24B) | -750(7)  | -2175(4) | 9352(7) | 63    |
| H(24C) | -667(7)  | -1164(9) | 8662(3) | 63    |
